# Supplementary material for: Sequence heterochrony led to a gain of functionality in an immature stage of the central complex: a fly-beetle insight
Source: bioRxiv or medRxiv preprint supplement (doi:10.1101/2019.12.20.883900), 2019-12-20
Supplement: Supplementary file [file media-1.pdf]

1 **Supporting Information for**

2 **Sequence heterochrony led to a gain of functionality in an immature stage of**

3 **the central complex: a fly-beetle insight**

4

5 **Authors:**

6 Max S. Farnworth<sup>a,c</sup>, Kolja N. Eckermann<sup>b,c</sup>, Gregor Bucher<sup>a,\*</sup>

7

8 <sup>a</sup> Department of Evolutionary Developmental Genetics, Johann-Friedrich-Blumenbach Institute, GZMB, University of

9 Göttingen, Göttingen, Germany, <sup>b</sup> Department of Developmental Biology, Johann-Friedrich-Blumenbach Institute,

10 GZMB, University of Göttingen, Göttingen, Germany, <sup>c</sup> Göttingen Graduate Center for Molecular Biosciences,

11 Neurosciences and Biophysics (GGNB), Göttingen, Germany

12

13 \* Corresponding author: [Gregor Bucher](#)

14 Email: [gbucher1@uni-goettingen.de](mailto:gbucher1@uni-goettingen.de)

15 Supporting Figures and Tables

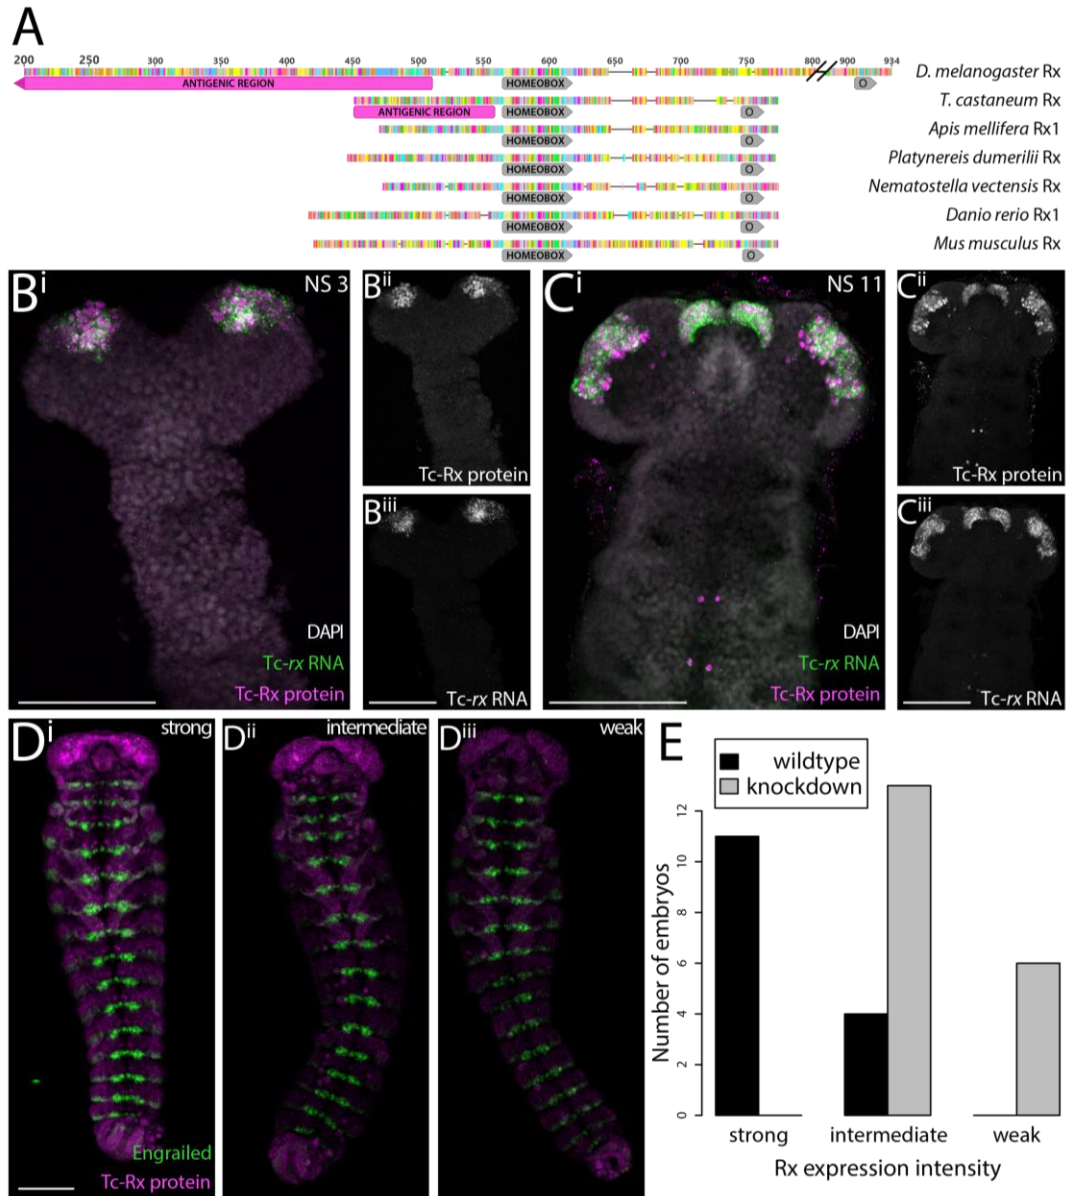

16

17 **S1 Figure: Generation and validation of the Tc-Rx antibody. (A)** Alignment (Geneious 11.1.5, Geneious Alignment)

18 of Rx proteins of *Drosophila* and *Tribolium* as well as representative species. The conserved homeobox and OAR (O)

19 domains (grey) are present in all proteins. Antigenic regions for the Dm-Rx (1,2) and the Tc-Rx antibody are

20 displayed in magenta. The Dm-Rx protein was shortened for better display (amino acids 1 to 200 and most between

21 800 and 900 are not displayed). Notice that the *Drosophila melanogaster* (*D. melanogaster*) antigenic region

22 appears to be absent in *Tribolium castaneum* (*T. castaneum*) and all other species. **(B-C)** Tc-Rx protein and Tc-rx

23 RNA expression in *Tribolium* embryos of neurogenesis stages 3 and 11 (3) were depicted (Zeiss LSM510, 40x  
24 immersion objective) as maximum intensity projections (DAPI for structure as average projection). Anterior is to  
25 the top. Animals were mounted dorsal up. The signal detected in the antibody staining against Tc-Rx protein  
26 (magenta) overlapped to a high degree with the signal detected in the in situ hybridization (green). Note that while  
27 the protein of Tc-Rx was located in the nucleus, *Tc-rx* RNA was also in the cytoplasm of the cell soma which resulted  
28 in a different cellular localization. **(D)** To validate the specificity of the Tc-Rx antibody, we performed a RNAi  
29 mediated *Tc-rx* knockdown. Indeed, Tc-Rx expression was reduced in knockdown embryos. Depicted are three  
30 categories of Tc-Rx expression (i.e. Tc-Rx antibody staining intensity, magenta, as maximum intensity projections)  
31 after knockdown (strong, equaling wildtype, in D<sup>i</sup>, intermediate in D<sup>ii</sup>, weak in D<sup>iii</sup>). To accommodate for differences  
32 in intensity of staining, a co-staining against Invected/Engrailed with the respective antibody was performed. **(E)** 34  
33 RNAi embryos were categorized into the three expression intensity groups in a blinded experiment. Wildtype  
34 animals showed a high level of expression and were mostly grouped in category 'strong' with some in category  
35 'intermediate'. No knockdown animals were grouped into the 'strong' category, most in 'intermediate' and some in  
36 'weak' (Fisher's exact test, P<0.001). Scale bars represent 100 μm.

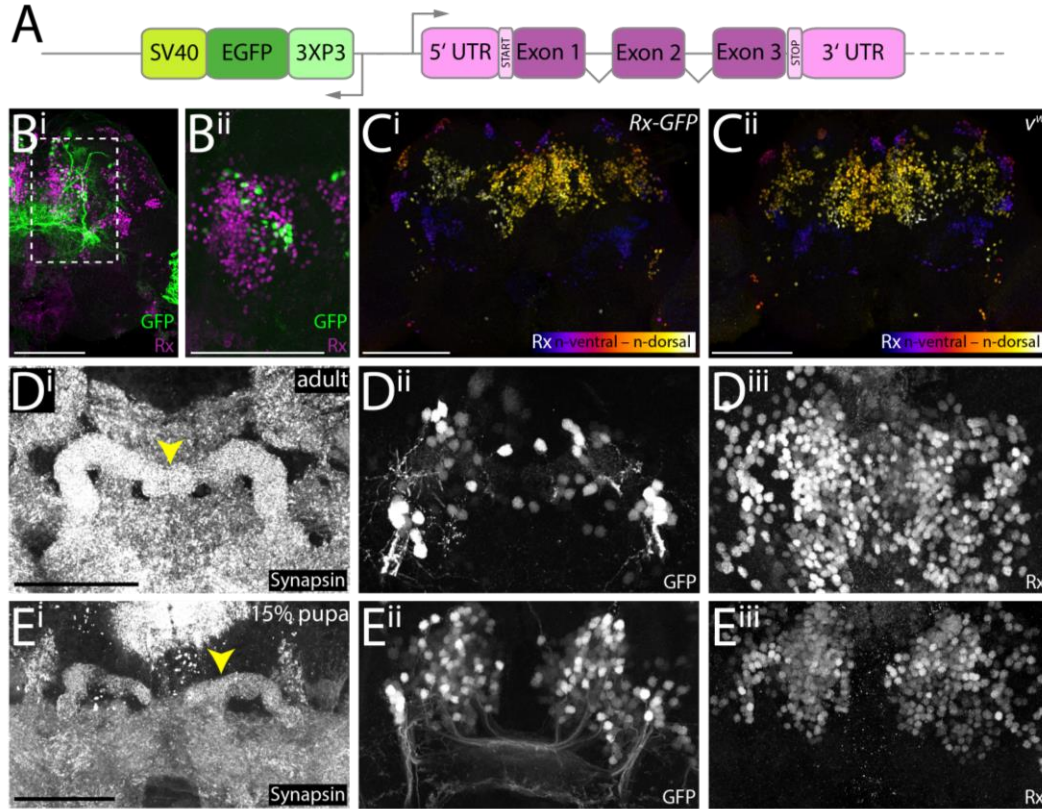

37  
 38 **S2 Figure: Characterization and validation of *Tribolium rx-EGFP* enhancer trap line. (A)** The *Tribolium rx-EGFP*  
 39 enhancer trap was taken from the GEKU screen collection (4) where enhancer traps were generated by *piggyBac*-  
 40 mediated transposition. A *3XP3-EGFP-SV40* cassette randomly inserted upstream of the *Tc-rx* gene in opposite  
 41 direction (insertion site mapped by (4)). **(B)** Maximum intensity projections of immunostainings against GFP and Tc-  
 42 Rx in adult brains of the *Tc-rx-EGFP* line. The line only marked a small subset (approximately 5-10 %) of Tc-Rx  
 43 expressing cells in the adult. This also applies to the n-dorsal region (B<sup>ii</sup>). However, all GFP expressing cells also  
 44 expressed Tc-Rx. Coexpression was verified manually. **(C)** The introduction of the enhancer trap cassette did not  
 45 visually influence Tc-Rx expression, as domains were highly similar between transgenic Rx-GFP (B<sup>i</sup>) and wildtype  
 46 *vermillion-white* (*v<sup>w</sup>*, B<sup>ii</sup>, (5)) animals, as visualized by color-coded maximum intensity projections. Observed  
 47 qualitative differences in Tc-Rx expression in the transgenic or wildtype condition (N=3 each) were approximately  
 48 as large as the differences between the genetic backgrounds. **(D)** A crop of a maximum intensity projection of cells  
 49 surrounding the adult protocerebral bridge (yellow arrowhead, D<sup>i</sup>) shows the coexpression of GFP (D<sup>ii</sup>) and Tc-Rx  
 50 (D<sup>iii</sup>) in a subset of cells that were subsequently used in this study. **(E)** An analogous analysis in young pupal brains

51 of cells surrounding the protocerebral bridge ( $E^i$ ) revealed more GFP expressing cells ( $E^{ii}$ ) with overlap to Tc-Rx cells  
52 ( $E^{iii}$ ) than in the adult (D). Scale bars in B and C represent 100  $\mu\text{m}$  and in D and E 50  $\mu\text{m}$ .

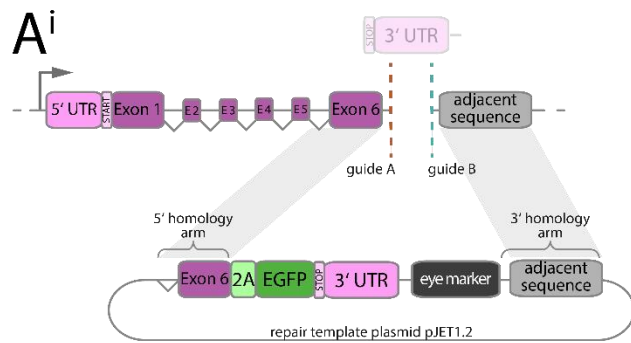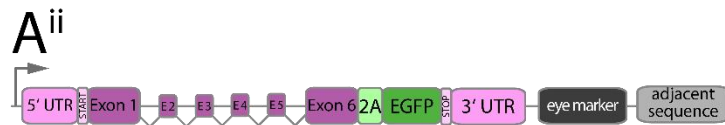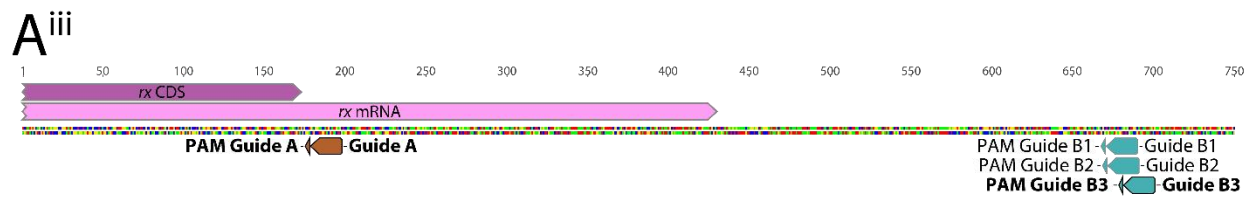

**B**

1. gRNA sequences

| Guide ID | Target including PAM  |     | strand    |
|----------|-----------------------|-----|-----------|
| A        | GCACCTTAGCTAGGAACCGAC | TGG | antisense |
| B1       | AGCCTTGACACAGGCGATTAG | TGG | antisense |
| B2       | GCCTTGACACAGGCGATTAGT | GGG | antisense |
| B3       | CTCATTAAAGTAGCCTTGCAC | AGG | antisense |

2. Transgenesis statistics

|                                                          |                 |
|----------------------------------------------------------|-----------------|
| # injected embryos                                       | 1203            |
| # surviving G <sub>0</sub>                               | 424             |
| # fertile G <sub>0</sub>                                 | 224             |
| # positive G <sub>0</sub> (% of fertile G <sub>0</sub> ) | <b>27 (12%)</b> |

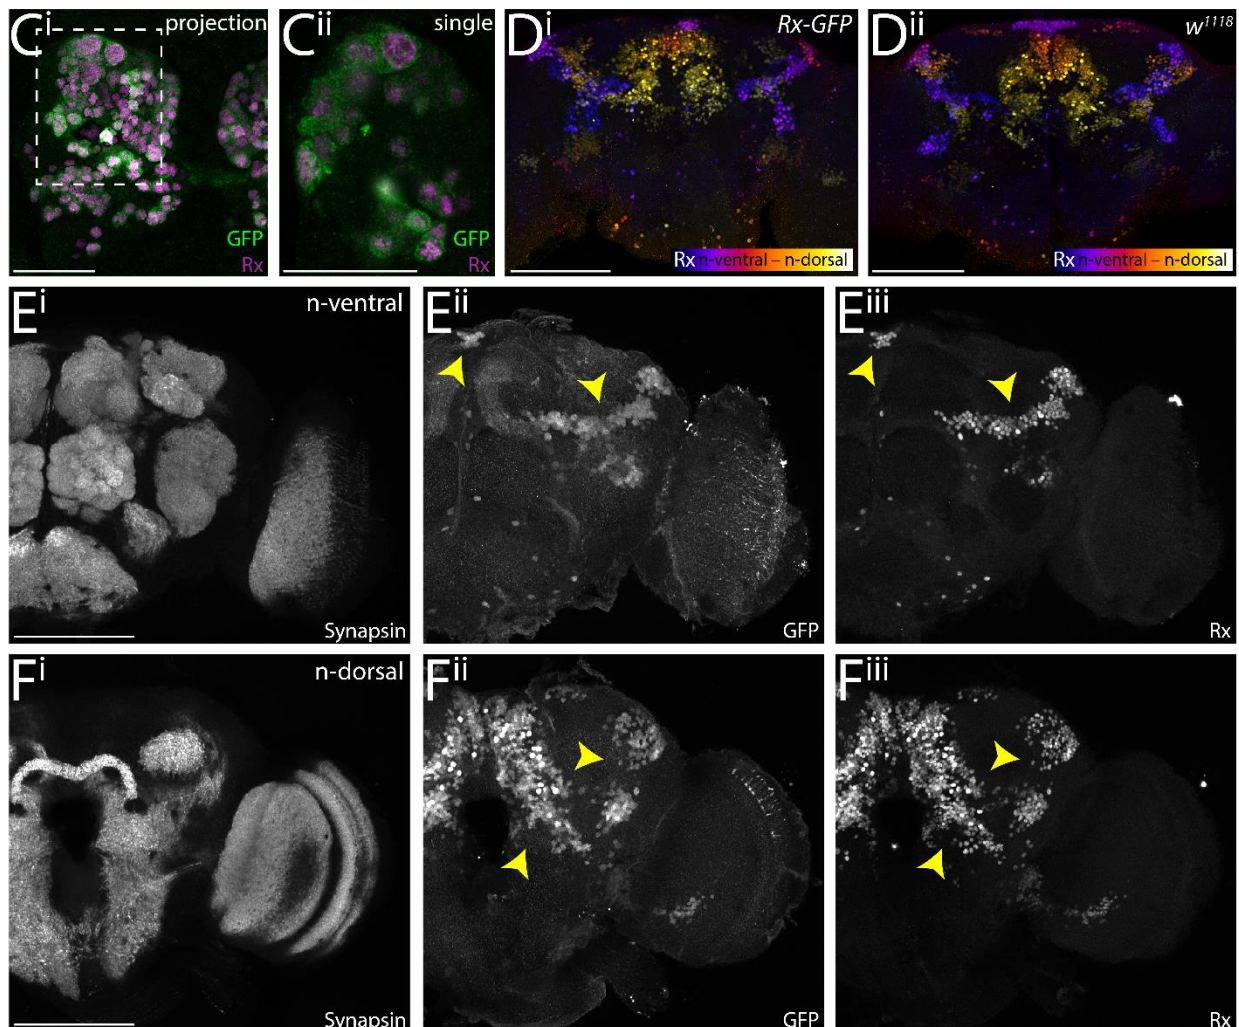

54 **S3 Figure: Strategy, generation and validation of *Drosophila* bicistronic *rx*-EGFP transgenic line. (A<sup>i</sup>)** Strategy of  
55 building a *Dm-rx*-EGFP line (modified from (6)). Two gRNAs next to the endogenous STOP codon (guide A, brown  
56 dashed line) and downstream of the *Dm-rx* 3'UTR (guide B, blue dashed line) were used. The DNA repair template  
57 included a sequence encoding for a *P2A* self-cleaving peptide, *EGFP*, the endogenous region between guide A and B  
58 (*Dm-rx* 3'UTR and a fraction of intergenic region), and the *3xP3-DsRed-SV40* eye marker, as well as 1 kb homology  
59 arms flanking the insertion sites. (A<sup>ii</sup>) The edited transgenic locus comprises a common open reading frame of both  
60 *Dm-rx* and *EGFP* with a STOP after *EGFP*. (A<sup>iii</sup>) Four gRNAs were used in different combinations to generate similar  
61 transgenic lines. The gRNAs used for the transgenic line used in this study are marked in bold (guide A and B3). (B)  
62 Overview of gRNA sequences and transgenesis statistics upon injection (7) for the *Drosophila* Rx-GFP transgenic  
63 line. (C<sup>i</sup>) Immunostaining of anti-Dm-Rx (magenta) and anti-GFP (green) in the *Dm-rx*-EGFP line showed that all  
64 visible cells that expressed Dm-Rx also expressed GFP, shown in a smooth manifold extension (SME) projection (8)  
65 of a brain hemisphere of a S16 embryo. The region marked with a dotted line in C<sup>i</sup> is shown in (C<sup>ii</sup>) as a single slice.  
66 Here, the different cellular localizations are visible. Dm-Rx retained its nuclear localization, while GFP located to the  
67 cytoplasm, demonstrating functionality of the P2A peptide. (D) The transgenic line had normal Dm-Rx expression,  
68 shown by anti-Dm-Rx immunostaining and depth color-coded maximum intensity projection in the Rx-GFP line (D<sup>i</sup>)  
69 and the origin wildtype strain *w*<sup>1118</sup> (D<sup>ii</sup>). Observed qualitative differences in Dm-Rx expression in the transgenic or  
70 wildtype condition (N=3 each) were approximately as large as the differences between the genetic backgrounds. (E-  
71 F) Dm-Rx and EGFP expression matched in adult brains (see yellow arrowheads for exemplary double-positive  
72 areas). Maximum intensity projections of synapsin immunostainings (E<sup>i</sup>, F<sup>i</sup>), GFP (E<sup>ii</sup>, F<sup>ii</sup>) and Dm-Rx (E<sup>iii</sup>, F<sup>iii</sup>) in an  
73 adult *Drosophila* brain. Anti-synapsin (E<sup>i</sup>, F<sup>i</sup>) marked brain position. E is n (neuraxis)-ventral and F is n-dorsal (9).  
74 Scale bars in D-F represent 100  $\mu$ m and in C 25  $\mu$ m.

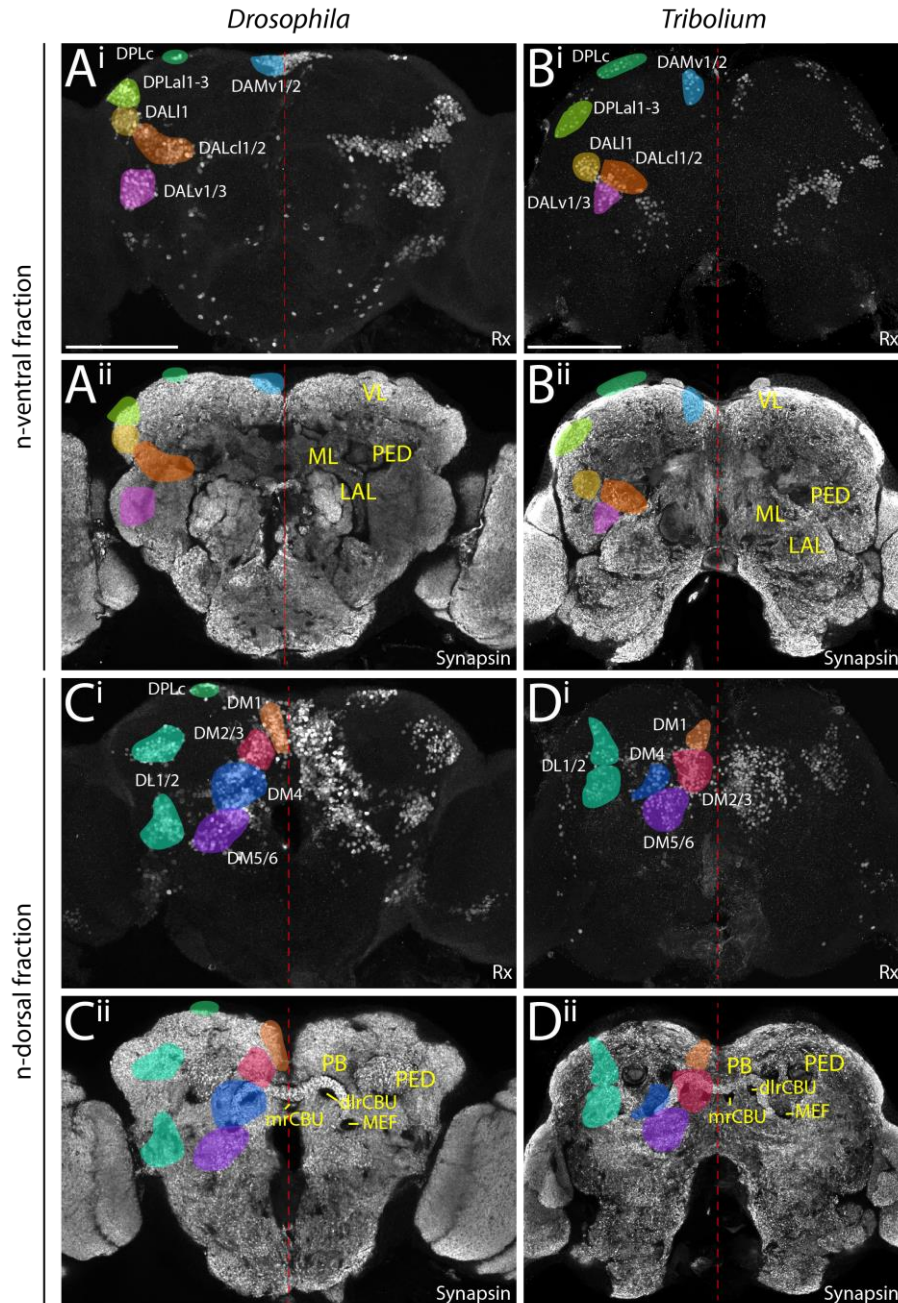

75  
 76 **S4 Figure: Conserved expression of Rx protein in the adult brain of *Drosophila melanogaster* (A, C) and *Tribolium***  
 77 ***castaneum* (B, D) as well as lineages marked by Rx expression.** We mapped the labeled Rx-positive cells to  
 78 previously described lineages of the *Drosophila* brain using locations relative to other brain structures and their  
 79 projection pattern as criterion ((10,11); [www.mcdb.ucla.edu/Research/Hartenstein/dbla/index.html](http://www.mcdb.ucla.edu/Research/Hartenstein/dbla/index.html) and references  
 80 therein). We tentatively named *Tribolium* cell clusters by using similar locations and projections as compared to the  
 81 *Drosophila* atlas, used as guide. A list of all lineages with names and descriptions can be found in Table S1.



82 Hemispheres are separated by a red dotted line for orientation. Due to the cell body and expression of Rx, domains  
83 and proposed lineages could be separated into two fractions, n-ventral and n-dorsal, corresponding to each half of  
84 the insects' brains. For each species, one image stack was used and separated into two fractions. Rx expression is  
85 displayed by a maximum intensity projection of a sub-stack of an anti-Rx immunostaining (i). Basic anatomical  
86 structure of the insects' brains is displayed by a SME projection (8) of a synapsin immunostaining (ii). On this  
87 projection, in the left hemisphere the locations of the proposed lineages are shown color-coded, while on the right  
88 hemispheres, basic anatomical structures are annotated that assist understanding differences in domain position  
89 between the species (yellow). Abbreviations: VL vertical lobe, ML medial lobe, PED peduncle, LAL lateral accessory  
90 lobes, mrCUB medial root of the upper division of the central body, dlrFB dorso-lateral root of the CUB, PB  
91 protocerebral bridge, MEF medial equatorial fascicle. Scale bars represent 100  $\mu\text{m}$ .

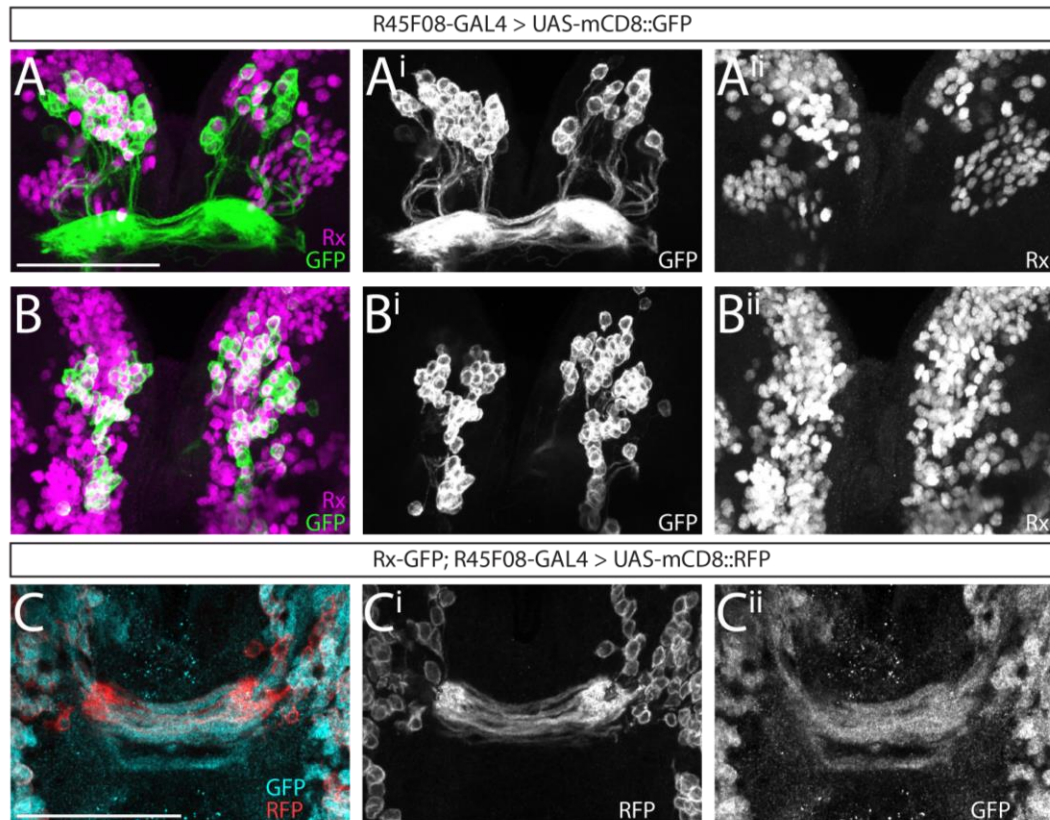

92  
 93 **S5 Figure: Previously described *pointed*-positive cells of the central complex are a subset of Dm-Rx-positive cells.**  
 94 Displayed is a co-localization of Dm-Rx-positive neural cells and cells under the control of R45F08-GAL4 (12,13)  
 95 shown in brains of *Drosophila* wandering third instar larvae. **(A-B)** Antibody staining in a cross of the R45F08-GAL4  
 96 line and UAS-mCD8::GFP was performed against Dm-Rx (depicted in magenta) and GFP (green) to reveal the  
 97 coexpression of cell bodies of lineages DM1-3/6, marked through the R45F08-GAL4 line, and Dm-Rx. Approximately  
 98 90% of the R45F08-GAL4 GFP positive cells were Dm-Rx-positive as well (A-A<sup>ii</sup> first half, B-B<sup>ii</sup> second half of the  
 99 stack). **(C)** Antibody staining in animals (N=2) of the respective cross from subcrosses of the Rx-GFP line each with  
 100 R45F08-GAL4 line and the UAS-mCD8::RFP (SMEs, see (8)). This resulted in a coexpression of GFP in a Dm-Rx  
 101 expression pattern and RFP under control of R45F08-GAL4. Antibody staining against GFP (cyan) and RFP (red)  
 102 revealed coexpression of both fluorescent proteins in midline crossing projections. Although RFP is membrane-  
 103 bound and GFP cytoplasmic, there were several fascicles showing coexpression of RFP and GFP. This corroborated  
 104 the high degree of overlap of Dm-Rx and DM1-3/6 lineage offspring shown in panels A and B. Scale bars represent  
 105 50 μm.

106 **S1 Table: Proposed lineages expressing Rx in the adult *Drosophila (Dm)* and *Tribolium (Tc)* brain.** Listed are eleven  
 107 lineages with identifier, name and a description relative to the neuroaxis, as well as the position in Fig. 2 and S4  
 108 Figure and the degree how unequivocally the assignment of their stereotypical projections was. Identification of  
 109 lineages is based on (10,11), <https://www.mcdb.ucla.edu/Research/Hartenstein/dbla/index.html>, and references  
 110 therein. Abbreviations: PED peduncle, LAL lateral accessory lobes, AVLP anterior ventrolateral protocerebrum, SLP  
 111 superior lateral protocerebrum, SMP superior medial protocerebrum, PB protocerebral bridge, MEF medial  
 112 equatorial fascicle, CA calyx.

| <b>Lineage identifier (alternative)</b> | <b>Lineage name</b>                                                  | <b>Description (relative to neuraxis)</b>                     | <b>Fraction</b> | <b>Dm: projections identifiable?</b> | <b>Tc: projections identifiable?</b> |
|-----------------------------------------|----------------------------------------------------------------------|---------------------------------------------------------------|-----------------|--------------------------------------|--------------------------------------|
| DALc1/2                                 | dorso-anterior lateral, centro-lateral 1/2                           | n-ventro-lateral to PED, n-anterior to LAL                    | n-ventral       | yes                                  | no                                   |
| DAL1/2                                  | dorso-anterior lateral, lateral 1/2                                  | n-anterior to AVLP, n-ventral and lateral to PED              | n-ventral       | yes, DAL1                            | no                                   |
| DALv1/3                                 | dorso-anterior lateral, ventral                                      | n-ventral to AVLP, lateral to LAL                             | n-ventral       | no                                   | no                                   |
| DPLal1-3                                | dorso-posterior lateral, antero-lateral 1-3                          | lateral to anterior SLP                                       | n-ventral       | partially, DPLal2/3                  | no                                   |
| DPLc                                    | dorso-posterior lateral, central                                     | n-anterior to posterior SLP                                   | n-ventral       | yes                                  | no                                   |
| DAMv1/2                                 | dorso-anterior medial ventral 1/2                                    | n-anterior to SMP                                             | n-ventral       | yes                                  | no                                   |
| <b>DM1 (DPMm1)</b>                      | <b>dorso-medial 1 (dorso-posterior medial, medial 1)</b>             | n-anterio-dorsal (Tc)/n-anterio-ventral (Dm) and medial to PB | <b>n-dorsal</b> | <b>yes</b>                           | <b>yes</b>                           |
| <b>DM2/3 (DPMpm1/2)</b>                 | <b>dorso-medial 2/3 (dorso-posterior medial, postero-medial 1/2)</b> | n-dorso-medial to PB                                          | <b>n-dorsal</b> | <b>yes</b>                           | <b>yes</b>                           |
| <b>DM4 (CM4)</b>                        | <b>dorso-medial 4 (centromedial 4)</b>                               | n-posterio-lateral to PB, n-dorsal to MEF                     | <b>n-dorsal</b> | <b>yes</b>                           | <b>yes</b>                           |
| DM5/6 (CM1/3)                           | dorso-medial 5/6 (centromedial 1/3)                                  | n-posterio-lateral to PB, n-posterio-dorsal to MEF            | n-dorsal        | no                                   | no                                   |
| CP2/3 (DL1/2)                           | centroposterior 2/3 (dorsolateral 1/2)                               | n-posterio-lateral to CA and n-dorsal to posterior PED        | n-dorsal        | yes                                  | yes                                  |

113

114 **S2 Table: Primer list.** P1 to P12: black writing – annealing part, red – overlapping part, green – PAM modification.

| Name                            | Sequence                                                          | Purpose                                               |
|---------------------------------|-------------------------------------------------------------------|-------------------------------------------------------|
| Tc-rx-N_fw                      | ATGGAATCGGACCGTTGTGAAG                                            | protein expression                                    |
| Tc-rx-N_rev                     | CTTGCATCCGTCTCCCTC                                                | protein expression                                    |
| Golden Gate linker sequence fw  | CCAGGTCTCATGGT                                                    | protein expression                                    |
| Golden Gate linker sequence rev | GGGGGTCTCCTCGAGTCA                                                | protein expression                                    |
| GG_ccdB_F                       | ACATGATTGCGGCGTTGCC                                               | KNE001 vector                                         |
| GG_ccdB_R                       | TGTCTCTCGAGGAGACCGTCGACCTGCAGACT                                  | KNE001 vector                                         |
| GEKU-Rx-GFP_wt_fw               | AGTTGCGAGATGTGCGAGT                                               | homozygous stock generation                           |
| GEKU-Rx-GFP_wt_rev              | CGTCCAGACTTGCCACTTTG                                              | homozygous stock generation                           |
| GEKU-Rx-GFP_trans_rev           | CTCTAAAATAAGGCGAAAGGC                                             | homozygous stock generation                           |
| Tc-rx-probe-fw                  | ATGGAATCGGACCGTTGTGAAGA                                           | full length rx probe                                  |
| Tc-rx-probe-rev                 | GCAGTCCTTTGGTGATGTTCTCC                                           | full length rx probe                                  |
| I_P1_Back-F1                    | CCGGATGGCTCGAGTTTTTCAGCAAGATCACATCG<br>CCTGGGATGCG                | rx bicistronic construct                              |
| I_P2_Rev_F1                     | GACAATGGATACCATTCCTTGTTTCAGG                                      | rx bicistronic construct                              |
| I_P3_F1-F2                      | CCTGAACAAGGGAATGGTATCCATTGTCGGGTCCG<br>GCGCCACCAAC                | rx bicistronic construct                              |
| I_P4_Rev_F2-F3                  | GTGAACAGCTCCTCGCCCTGCTCACCATGGGGCC<br>GGGGTCTCCTCC                | rx bicistronic construct                              |
| I_P5_F2-F3                      | GACGTGGAGGAGAACCCTCGGCCCATGGTGAGCAA<br>GGGCGAGGAG                 | rx bicistronic construct                              |
| I_P6_Rev_Back-F3                | AGAATATTGTAGGAGATCTTCTAGAAAGATCTACT<br>TGACAGCTCGTCCATGCCGAG      | rx bicistronic construct                              |
| II_P7_Back-F4                   | CCGGATGGCTCGAGTTTTTCAGCAAGATCGTTAGT<br>CGGTTCTAGCTAAGTG           | rx bicistronic construct, PAM of guide A modified     |
| II_P8_Rev_F4-F5                 | CTCTAATTGAATTAGATCACATACGATTAGTATAA<br>CAGATAAGCATTCC             | rx bicistronic construct, PAM of guides B1-3 modified |
| II_P9_F4-F5                     | GCTTATCTGTTACTAATCGTATGTGATCTAATT<br>CAATTAGAGACTAATTCAATTAGAGC   | rx bicistronic construct, PAM of guides B1-3 modified |
| II_P10_Rev_F5-F6                | CATTAAGTAGCCTTGATACATGATGAGTTTGGA<br>CAAAC                        | rx bicistronic construct                              |
| II_P11_F5-F6                    | GTCCAACTCATCAATGTATCCAAGGCTACTTAAT<br>GAGTTGATTAATAAG             | rx bicistronic construct                              |
| II_P12_Rev_Ba-F6                | GAATATTGTAGGAGATCTTCTAGAAAGATGTTCTT<br>TCAATTTGTAAGACATAGGTTTTTAG | rx bicistronic construct                              |
| III_P13_Rev_F3                  | CTACTTGACAGCTCGTCCATGCCGAG                                        | rx bicistronic construct                              |
| III_P14_F3-F4                   | CTCGGCATGGACGAGCTGTACAAGTAGCGTTAGTC<br>GGTTCTAGCTAAGTG            | rx bicistronic construct                              |
| DmRx_CDS_3'UTR_fw               | CGTCTCTGCCACTAATTAGACAGC                                          | rx SNP sequencing                                     |
| DmRx_CDS_3'UTR_rev              | GAATAGACTTCTTCGTGAGCCG                                            | rx SNP sequencing                                     |
| DmRx_3'UTR_int-region_fw        | CGTGTTGTAAGTACATATTTCTGAGGCAG                                     | rx SNP sequencing                                     |
| DmRx_3'UTR_int-region_rev       | CTTGAGGAGCGAGGCACAC                                               | rx SNP sequencing                                     |
| DmRx_trans-ver_fw               | GTCGCCGCGAACCCTGAG                                                | rx molecular screening                                |
| DmRx_trans-ver_rev              | CATGGAGCCAGTAGTTCATGC                                             | rx molecular screening                                |
| DmRx_trans-ver_nested_fw        | CATAGAACTGCTCGATGTGG                                              | rx molecular screening                                |
| DmRx_trans-ver_nested_rev       | GATTCAACTGCGCTACTGC                                               | rx molecular screening                                |
| DmRx_trans_seq_Ct_fw            | GACTGGCAAGGGTTCGAG                                                | rx molecular screening                                |
| DmRx_trans_seq_iRe_rev          | CATGTGAGTCCTTTGTTTGC                                              | rx molecular screening                                |

116 **S3 Table: List of primary and secondary antibodies as well as dyes used in this study.**

| Antibody name                      | Antigen / Immunogen                                                                                                                  | Origin species | Source                                                               | Dilution                           |
|------------------------------------|--------------------------------------------------------------------------------------------------------------------------------------|----------------|----------------------------------------------------------------------|------------------------------------|
| anti-Dm-Rx                         | <i>Drosophila</i> Rx N-terminal fragment                                                                                             | rabbit         | gift from Dr. Uwe Walldorf (Saarbrücken, Germany), Davis et al. 2003 | 1:1000                             |
| anti-Tc-Rx                         | <i>Tribolium</i> Rx N-terminal fragment                                                                                              | guinea pig     | this paper                                                           | 1:750                              |
| anti-Engrailed 4D9                 | Engrailed/invected (Immunogen: Invected (C-terminal two-thirds of the invected protein); recombinant)                                | mouse          | gift from Dr. Marita Buescher (Göttingen, Germany), DSHB             | 1:10                               |
| chk-anti-GFP                       | GFP ( <i>Aequorea victoria</i> )                                                                                                     | chicken        | ab13970, Abcam (Cambridge, UK), used in Supplementary Figure 3 and 6 | 1:1500                             |
| rab-anti-GFP                       | GFP ( <i>Aequorea victoria</i> )                                                                                                     | rabbit         | A11122, ThermoFisher Scientific/Invitrogen (MA, USA)                 | 1:1000                             |
| anti-RFP                           | RFP (full length)                                                                                                                    | rabbit         | ab62341, Abcam (Cambridge, UK)                                       | 1:1000                             |
| anti-Synapsin                      | Synapsin (Immunogen: GST-Synapsin-GST fusion protein expressed in <i>E. coli</i> and purified by glutathione affinity)               | mouse          | gift from Dr. Christian Wegener (Würzburg, Germany), DSHB            | 1:15-1:40                          |
| anti- $\alpha$ -acetylated Tubulin | $\alpha$ -acetylated Tubulin (Immunogen: acetylated tubulin from the outer arm of <i>Strongylocentrotus purpuratus</i> (sea urchin)) | mouse          | T7451, MERCK/Sigma-Aldrich (Darmstadt, Germany)                      | 1:40                               |
| anti-rab-Alexafluor 488            | rabbit (Gamma Immunoglobins Heavy and Light chains)                                                                                  | goat           | A11070, ThermoFisher Scientific/Invitrogen (MA, USA)                 | 1:1000 embryos, 1:500 other stages |
| anti-chk-Alexafluor 488            | chicken (Gamma Immunoglobins Heavy and Light chains)                                                                                 | goat           | A11039, ThermoFisher Scientific/Invitrogen (MA, USA)                 | 1:1000 embryos, 1:500 other stages |
| anti-mou-Alexafluor 555            | mouse (Gamma Immunoglobins Heavy and Light chains)                                                                                   | goat           | A21425, ThermoFisher Scientific/Invitrogen (MA, USA)                 | 1:1000 embryos, 1:500 other stages |
| anti-rab-Alexafluor 555            | rabbit (Gamma Immunoglobins Heavy and Light chains)                                                                                  | goat           | A21430, ThermoFisher Scientific/Invitrogen (MA, USA)                 | 1:1000 embryos, 1:500 other stages |
| anti-rab-Alexafluor 647            | rabbit (Gamma Immunoglobins Heavy and Light chains)                                                                                  | goat           | A21245, ThermoFisher Scientific/Invitrogen (MA, USA)                 | 1:1000 embryos, 1:500 other stages |
| anti-gp-Alexafluor 647             | guinea pig (Gamma Immunoglobins Heavy and Light chains)                                                                              | goat           | A21450, ThermoFisher Scientific/Invitrogen (MA, USA)                 | 1:1000 embryos, 1:500 other stages |
| Dye name                           | Source                                                                                                                               | Dilution       |                                                                      |                                    |
| DAPI                               | D1306, ThermoFisher Scientific (MA, USA)                                                                                             | 1:1000         |                                                                      |                                    |

117

118 **S4 Table: *Drosophila* and *Tribolium* stocks used in this study.**

| Species           | Stock name                 | Stock Number  | Source                                   | Description                                                                                            |
|-------------------|----------------------------|---------------|------------------------------------------|--------------------------------------------------------------------------------------------------------|
|                   | <b>Rx-GFP</b>              | -             | <b>this paper</b>                        | <b>Genotype: <math>w^{1118}</math>, 3XP3-dsRED, <math>rx^{GFP}</math>; founder 374.2; primary line</b> |
|                   | $w^{1118}$                 | e.g. 3605     | e.g. Bloomington Drosophila Stock Center | used for control experiments (S3 Figure)                                                               |
|                   | Act5C-Cas9, Lig4[169]      | 58492         | Bloomington Drosophila Stock Center      | (7), Cas9 line used for generation of Rx-GFP bicistronic line (S3 Figure)                              |
| <i>Drosophila</i> | $w^{1118}; wg^{Gla-1}/CyO$ | -             | Wimmer Department, Göttingen (gift)      | used to generate homozygous stocks of the Rx-GFP bicistronic line (S3 Figure)                          |
|                   | R45F08-Gal4                | 49565         | Bloomington Drosophila Stock Center      | (12,13); used to determine overlap of lineages DM1-3/6 to Rx expressing cells (S5 Figure)              |
|                   | 20xUAS-mCD8::GFP           | 32194         | Bloomington Drosophila Stock Center      | Chromosome 3, used to determine overlap of lineages DM1-3/6 to Rx expressing cells (S5 Figure)         |
|                   | UAS-mCD8::ChRFP            | 27392         | Bloomington Drosophila Stock Center      | Chromosome 3, used to determine overlap of lineages DM1-3/6 to Rx expressing cells (S5 Figure)         |
|                   | <b>Rx-GFP</b>              | <b>E01101</b> | <b>GEKU-base</b>                         | <b>ref (4), primary line</b>                                                                           |
| <i>Tribolium</i>  | $v^w$                      | -             | ref (5)                                  | vermillion <sup>white</sup> , (5), used for control experiments (S2 Figure)                            |

119

120 **S5 Table: Description and definition of fifteen central complex related events used in this study to illustrate**  
121 **heterochronic development in *Tribolium castaneum* (*Tc*), *Drosophila melanogaster* (*Dm*) and *Schistocerca***  
122 ***gregaria* (*Sg*).** Events were defined by using our dataset of anti-GFP and anti-synapsin stainings with both species,  
123 to determine potential differences between them, and by using the central complex literature as reference point.  
124 Time points for each event are included, as absolute time in hours and relative time per developmental period in  
125 percent. Note that length of embryonic developmental periods was taken from (3,14) and Scholten and Klingler  
126 (unpublished), stages were determined using morphological criteria and then time points were calculated from  
127 these works. Larval and pupal developmental times were determined specifically for our *rx* transgenic lines and  
128 pupal time points were then verified by morphological criteria using works by Dippel (unpublished) and (15).  
129 Information on *Schistocerca* central complex events as well as relative and absolute developmental time was taken  
130 from (16–19). Abbreviations: PB protocerebral bridge, CB central body, CBU upper division of the central body, CBL  
131 lower division of the central body, NO noduli, *Tc* *Tribolium castaneum*, *Dm* *Drosophila melanogaster*, *Sg*  
132 *Schistocerca gregaria*.

| Event No. | Short description                  | Definition                                                                                                                                                                                                                                                                          | Time point in <i>Dm</i> | Time point in <i>Tc</i>              | Time point in <i>Sg</i> |
|-----------|------------------------------------|-------------------------------------------------------------------------------------------------------------------------------------------------------------------------------------------------------------------------------------------------------------------------------------|-------------------------|--------------------------------------|-------------------------|
| 1         | first axon projection              | The first axonal projection of Rx-positive cells in the prospective central complex region                                                                                                                                                                                          | 8.8h/37%                | 28h/39%                              | 144h/30%                |
| 2         | first midline-crossing projection  | The first projection of Rx-positive cells that spans across the midline                                                                                                                                                                                                             | 10.3h/43%               | 42h/58%                              | 168h/35%                |
| 3         | larva-like morphology              | A pattern of projections and cell body location that allows clear identification of DM1-4 lineage origin and is thus similar to the larval pattern                                                                                                                                  | 12.2h/51%               | 58h/81%                              |                         |
| 4         | end of larval growth period        | The end of larval growth at the end of development of the last larval instar, correlated with an increase in size of central complex structures but without notable changes in morphology                                                                                           | 95.3h/95%               | 482.4h/95%                           |                         |
| 5         | adult-like WXYZ tracts             | The presence of identifiable WXYZ tracts, i.e. axonal fiber bundles corresponding to DM1-4, that project in a similar morphological way and shape as in the adult, i.e. first n-posterior, then towards the midline in a region corresponding to a central body neuropil            | 104h/5%                 | 58h/81%                              |                         |
| 6         | first fascicle switching           | The first occurrence of fascicle switching, causing a decussated fiber pattern, i.e. X-shaped crossings in the central complex                                                                                                                                                      | 104h/5%                 | 58h/81%                              | 264h/55%                |
| 7         | first functional PB                | The first synapsin-positive structure identifiable as protocerebral bridge                                                                                                                                                                                                          | 104h/5%                 | 72h/100%                             |                         |
| 8         | first functional CB                | The first synapsin-positive structure identifiable as central body                                                                                                                                                                                                                  | 104h/5%                 | 72h/100%                             |                         |
| 9         | division of PB into columns        | Presence of vertical subdivisions in the PB, apparent in an anti-synapsin staining                                                                                                                                                                                                  | 114h/15%                | 482.4h/95%                           |                         |
| 10        | first functional CB with CBU + CBL | The first synapsin-positive structure identifiable as a lower division of the central body (or ellipsoid body), i.e. the first division into lower and upper central body part                                                                                                      | 114h/15%                | 504h/0%                              |                         |
| 11        | first functional NO                | The first synapsin-positive structure identifiable as noduli                                                                                                                                                                                                                        | 114h/15%                | 504h/0%                              |                         |
| 12        | division of CB into columns        | Presence of vertical subdivisions in the CB region primarily based on patterns of the <i>rx</i> transgenic line (anti-GFP) and secondarily a heterogenous distribution of synapses, most importantly the absence of synapsin in otherwise anti-GFP positive regions (anti-synapsin) | 114h/15%                | 504h/0%                              | 312h/65%                |
| 13        | fusion of PB                       | The fusion of the protocerebral bridge at the midline                                                                                                                                                                                                                               | 139h/40%                | 511-532h/5-20%<br>mean: 521.5h/12.5% |                         |
| 14        | grossly adult-like anatomy         | An anatomy that grossly resembles the adult pattern, particularly with respect to the DM1-4 cell bodies and tracts                                                                                                                                                                  | 149h/50%                | 574h/50%                             | 336h/70%                |
| 15        | adult anatomy                      | Mature central complex anatomy of the adult                                                                                                                                                                                                                                         | 199h/100%               | 644h/100%                            | 1848h/100%              |



| <i>Drosophila</i>         |                     |                                                                            | <i>Tribolium</i>    |                                                                                     |  |
|---------------------------|---------------------|----------------------------------------------------------------------------|---------------------|-------------------------------------------------------------------------------------|--|
| Stage                     | Time (h)            | Description                                                                | Time (h)            | Description                                                                         |  |
| <b>Embryos</b>            | variable            | All staging follows (14)                                                   | variable            | Staging to 48 h: (3); >48 h: Scholten and Klingler (unpublished)                    |  |
| <b>L1</b>                 | ≤ 1 after hatching  | selection after removing any previously hatched larvae on apple agar plate | ≤ 1 after hatching  | selection by falling through 300 µm gaze sieve on which embryos were kept           |  |
| <b>50 % (mid-) larva</b>  | 37.5                | timing started after selection like for L1, end of L2 larval development   | ~ 216 (9 d)         | timing started after selection like for L1, approximately L4 stage                  |  |
| <b>95 % (late-) larva</b> | 70-75               | up to event 2 (15), crawled to top, no movement                            | 410-432 (17-18 d)   | last larval stage, stemmata migration started, see Ho 1961                          |  |
| <b>0 % pupa</b>           | 0                   | up to event 8 (15), particularly shortened body, white puparium            | 0                   | stemmata migration ended (medial position near vertex), see (40)                    |  |
| <b>5 % pupa</b>           | 5                   | up to event 14 (15), operculum ridge visible, abdominal gas bubble         | 7                   | 2 rows of ommatidia, shiny cuticle, see (40), and Dippel (unpublished)              |  |
| <b>15 % pupa</b>          | 15                  | up to event 25 (15), particularly anterior bubble, expelled armature       | 21                  | 4 rows of ommatidia, mandible tip sclerotized, see (40), and Dippel (unpublished)   |  |
| <b>20 % pupa</b>          | 20                  | up to event 26 (15), criteria of 15 % and prominent Malpighian tubules     | 28                  | 4-6 rows of ommatidia, mandible tip sclerotized, see (40), and Dippel (unpublished) |  |
| <b>30 % pupa</b>          | 30                  | up to event 27 (15), criteria of 20 %, yellow body, eyes not included      | 42                  | 6 rows of ommatidia, mandible tip sclerotized, see (40), and Dippel (unpublished)   |  |
| <b>50 % pupa</b>          | 50                  | criteria of 30 %, otherwise only time                                      | 70                  | 7 rows of ommatidia, see (40), and Dippel (unpublished)                             |  |
| <b>adult</b>              | ≤ 12 after eclosion | eclosed with signs of virgin females (light body coloring)                 | ≤ 24 after eclosion | eclosed with light brown body coloring                                              |  |

136 **S7 Table: Immunohistochemistry in stages (excluding embryos) of both species.** There are two variations of adult  
 137 stainings. Antibodies were used as in Table S3 except for synapsin. PB phosphate buffer (20), T Triton-X-100 with %  
 138 in PB, PFA paraformaldehyde, NGS normal goat serum.

| Preparation steps               | L1 larvae                                                                          | Larvae                                                                                                                  | Pupae                                                                                                  | Adults                                                                                                            |
|---------------------------------|------------------------------------------------------------------------------------|-------------------------------------------------------------------------------------------------------------------------|--------------------------------------------------------------------------------------------------------|-------------------------------------------------------------------------------------------------------------------|
| <b>Fixation</b>                 | 1 h on ice, in 4 % PFA                                                             | 50 % larva: 1 h on ice, in 4 % PFA,<br>other: 1.5 h on ice, in 4 % PFA                                                  | 1.5 h on ice, in 4 % PFA                                                                               | 1.5-2 h on ice, in 4 % PFA                                                                                        |
| <b>Post-fixation washes</b>     | 1 rinse, 3 30 min washes in PB-T 0.1 %                                             | 50 % larva: 1 rinse, 3-4 30 min washes in PB-T 0.1 %,<br>other: 1 rinse, 3-4 30 min washes in PB-T 0.3 %                | 1 rinse, 3-4 30 min washes in PB-T 0.2-0.3 %                                                           | I: 1 rinse, 3-4 30 min washes in PB-T 0.3 %,<br>II: 1 rinse, 3-4 30 min washes in PB-T 0.5 %                      |
| <b>Blocking</b>                 | o/n at 4°C in 4 % NGS in PB-T 0.1 %                                                | o/n at 4°C in 5 % NGS in PB-T 0.1 % (50% larva), or 0.3 % (other)                                                       | o/n at 4°C in 5 % NGS in PB-T 0.2-0.3 %                                                                | I: o/n at 4°C in 5 % NGS in PB-T 0.5 %<br>II: 24 h at 4°C in 5 % NGS in PB-T 0.3 %                                |
| <b>First antibody</b>           | 4 h at RT in 2 % NGS in PB-T 0.1 %, Synapsin 1:30 (Dm), 1:20 (Tc)                  | 4-6 h at RT in 2 % NGS in PB-T 0.1 % (50%), 0.3 % (other), Dm Synapsin 1:30, Tc 1:20-30                                 | 5 h at RT or 40-48 h at 4°C in 2 % NGS in PB-T 0.2-0.3 %, Synapsin 1:25 (Dm), 1:15 (Tc)                | I: 6 h at RT in 2 % NGS in PB-T 0.5 %,<br>II: 72 h at 4°C in 2 % NGS in PB-T 0.3 %, Synapsin 1:25 (Dm), 1:15 (Tc) |
| <b>Post-1st antibody washes</b> | 1 rinse, 3 30 min washes in PB-T 0.1 %                                             | 1 rinse, 4 30 min washes in PB-T 0.1 % (50%), 0.3 % (other)                                                             | 1 rinse, 4 40 min washes in PB-T 0.2-0.3 %                                                             | 1 rinse, 4 50 min washes in PB-T 0.3/0.5 %                                                                        |
| <b>Secondary antibody</b>       | o/n at 4°C in 2 % NGS in PB-T 0.1 %                                                | o/n at 4°C in 2 % NGS in PB-T 0.1 % (50%), 0.3 % (other)                                                                | o/n to 24 h at 4°C in 2 % NGS in PB-T 0.2-0.3 %                                                        | I: 24 h at 4°C in 2 % NGS in PB-T 0.5 %<br>II: 48 h at 4°C in 2 % NGS in PB-T 0.3 %                               |
| <b>Post-2nd antibody washes</b> | 1 rinse, 1 30 min wash including DAPI, 1 rinse, 3 30 min washes, all in PB-T 0.1 % | 1 rinse, 1 30 min wash including DAPI, 1 rinse, 3 30 min washes, all in PB-T 0.1 % (50%), 0.3 % (other), 2 h wash in PB | 1 rinse, 1 30 min wash including DAPI, 1 rinse, 3 30 min washes, all in PB-T 0.2-0.3 %, 2 h wash in PB | 1 rinse, 1 30 min wash including DAPI, 1 rinse, 4 30 min washes, all in PB-T 0.3/0.5 %, 3 h wash in PB            |
| <b>Embedding medium</b>         | VectaShield H-1000 (Vector Laboratories)                                           | RapiClear 1.47 (SUNjin Lab, Hsinchu City, Taiwan)                                                                       | RapiClear 1.47 (SUNjin Lab, Hsinchu City, Taiwan)                                                      | RapiClear 1.47 (SUNjin Lab, Hsinchu City, Taiwan)                                                                 |

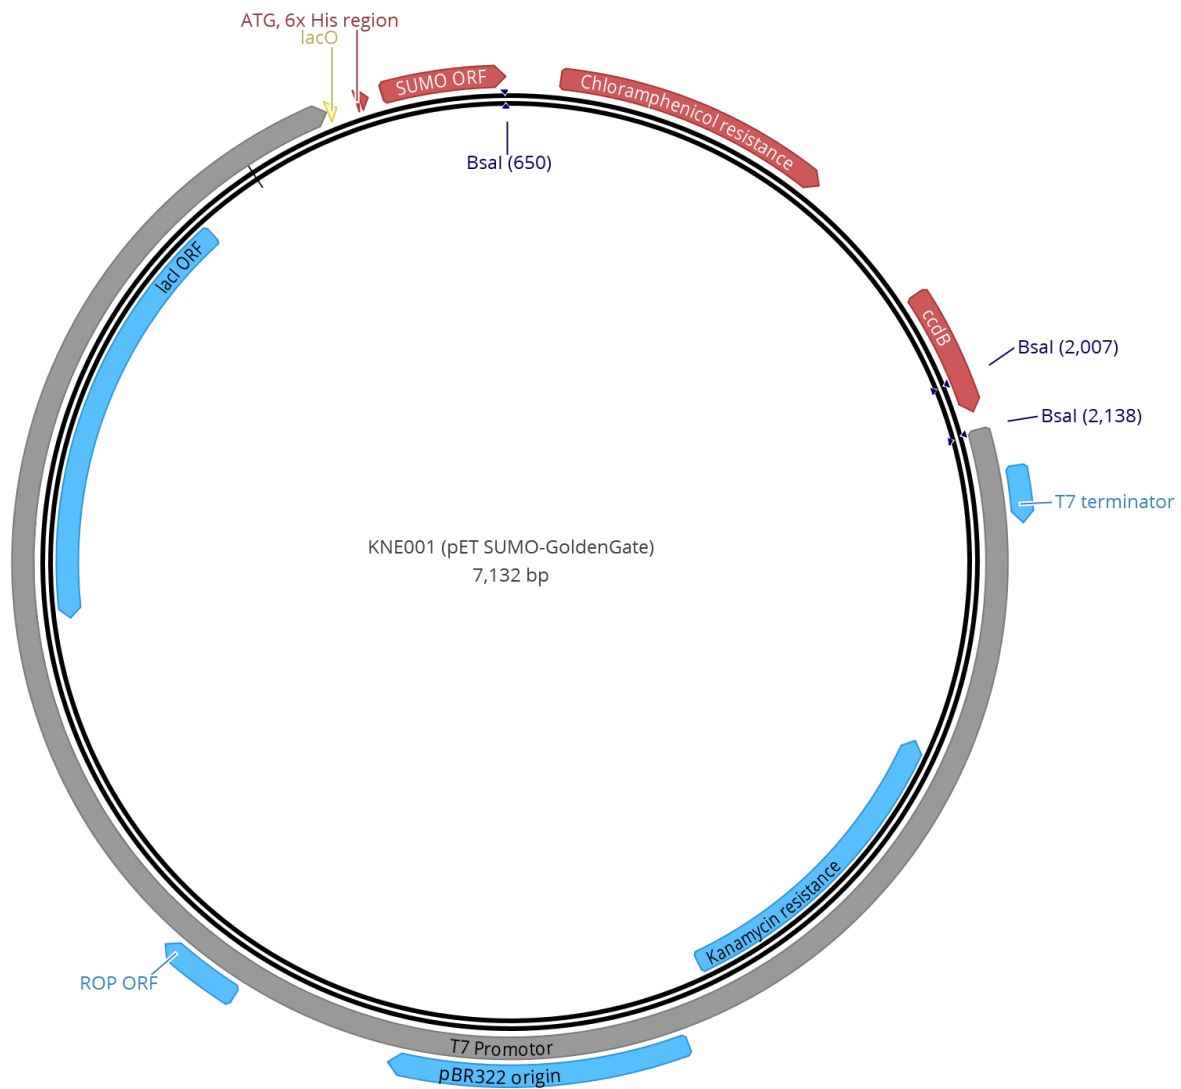

139

140 **Vector map S1: KNE001 vector map** (displayed with Geneious 11.1.5, <https://www.geneious.com>).

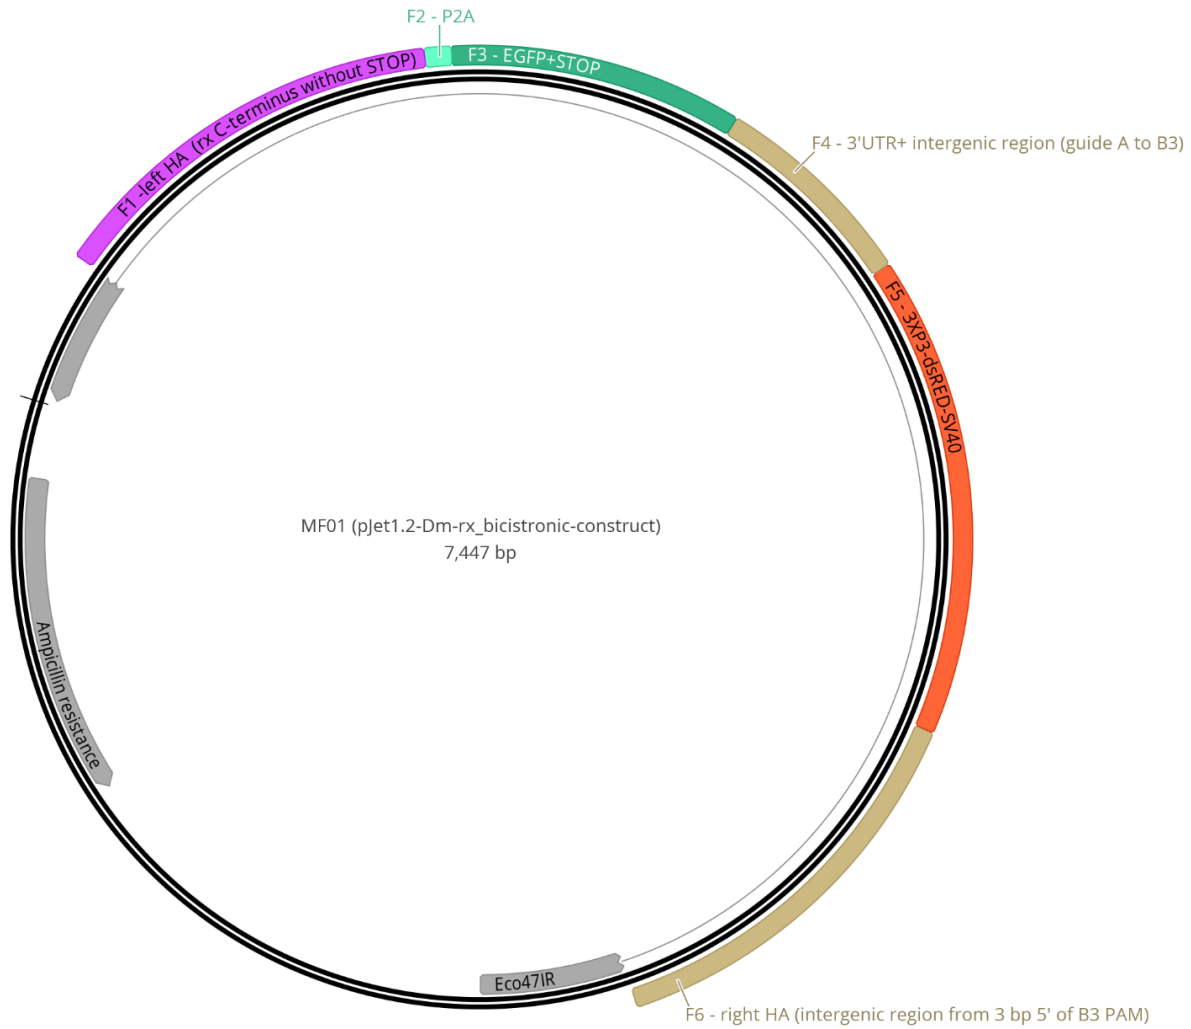

141

142 **Vector map S2: MF01 vector map** (displayed with Geneious 11.1.5, <https://www.geneious.com>). In the construct,

143 we included an insect codon-optimized version of the P2A peptide (21), with following sequence:

144 GGGTCCGGCGCCACCAACTTCTCCCTGCTGAAGCAGGCCGGCGACGTGGAGGAGAACCCCGGCCCC.

## 145 Supporting Results

### 146 Mapping of Rx-positive cell groups to known lineages of the insect adult brain

147 We aimed at determining to which previously described lineages the Rx-positive cells belonged.  
148 The lineages in *Drosophila* had been described as the published atlas (10,11). We reassigned them in the  
149 *Drosophila* brain and transferred *Drosophila* knowledge to the *Tribolium* brain. Assignments of conserved  
150 Rx expressing cell groups in the cell body rind in both species' brains were based on two aspects. First,  
151 synapsin staining revealed common synapse-rich neuropils as well as synapse-absent tracts and fascicles  
152 that can be homologized between the two species. With this, domains of the *Tribolium* brain could be  
153 linked to domains and known lineages in *Drosophila*. Second, since Rx-positive lineages were defined by  
154 stereotypical projections, an additional antibody staining against GFP in the characterized Rx transgenic  
155 lines (S2 and S3 Figures) revealed some lineage-typical projections. Therefore, projections helped in  
156 some cases to verify lineage identity beyond cell body position. However, for most lineages, projections  
157 were not distinguishable. We identified eleven lineages in both species that cover most of the Rx  
158 expressing cell groups in the adult brain (DALc1/2, DAL1/2, DALv1/3, DPLa1-3, DPLc, DAMv1/2, DM1  
159 (DPMm1), DM2/3 (DPMpm1/2), DM4 (CM4), DM5/6 (CM1/3), CP2/3 (DL1/2, S4 Figure, S1 Table): In the  
160 *Tribolium* brain, all n-ventral lineages were not marked by projections through our transgenic line. They  
161 have been identified due to the basic anatomical position of the cell bodies that was very similar to Rx  
162 expressing lineages in the *Drosophila* brain. In the *Drosophila* Rx-GFP line all n-ventral lineages were – if  
163 at all – only faintly marked by projections. Visible were projections of the lineage group DALc1/2 that  
164 projected n-posterior to the peduncle into the central complex, the likely dorsal tract of the DPLa1/2/3  
165 lineage that projected into the superior lateral protocerebrum, the short projection of the DPLc1  
166 sublineage and the dorso-medial projection of the DAMv1/2 lineage into the superior medial  
167 protocerebrum. In the n-dorsal fraction, both projections of hemilineages of the CP2/3 lineage were  
168 visible in both species, one reaching n-anterior over the peduncle and projecting into the superior medial

169 protocerebrum, one starting n-posterior of the peduncle and projecting n-ventro-anterior to it. With the  
170 available tools, we could not determine homology of these lineages further. To verify this tentative  
171 lineage identification, based mostly on cell body location, specific transgenic lines need to be generated  
172 and subsequent antibody stainings need to be performed, particularly in *Tribolium*, to further reveal the  
173 characteristic projection patterns of each lineage.

174

### 175 **Description of Rx-positive subgroups of DM1-4 lineages in *Tribolium* and *Drosophila***

176 In addition to the general descriptions of cell body location and projections on a lineage level (Fig. 2-  
177 3, S4 Figure), DM1-4 lineages were previously divided into sub-groups and single tracts (11). We wanted  
178 to describe which of those sub-groups and tracts are visible in the *Drosophila* adult brain and describe  
179 analogous sub-groups and tracts in *Tribolium*. These groups were differently marked in the imaging lines  
180 in both species due to the different design of the transgenic lines (see S2 and S3 Figures). Note that the  
181 projections of individual tracts or neurons in the respective neuropils were hard to distinguish because a  
182 high number of cells were marked.

183 In *Drosophila*, the DM4 Rx expressing cell group consisted of three subgroups, one localized n-  
184 anterior, and two n-posterior to the lateral tip of the PB. They projected axons to form a common  
185 projection as part of the MEF which bifurcated near the midline, where parts went into a n-ventral  
186 midline crossing projection n-ventral to the whole CX. This projection might be partially shared by the  
187 upper intermediate tract of CM3 or the dorsal tract of CM1 (11). The other part projected mainly into the  
188 CBU ('intermediate tract; (11). The DM3 Rx expressing group consisted of two groups, one more n-  
189 anterior, one n-posterior to the lateral side of the PB. The group's axons formed parts of the dlrCBU  
190 together with DM2 in the 'anterior-ventral tract' (11). Parts of these cells' axons projected into the n-  
191 dorsal plexus (also CBU<sub>uppl</sub>, or FB<sub>ppl</sub>, see e.g. (13)), while substantial parts went in a more n-ventro-  
192 posterior part together with DM4. DM2 consisted of three groups, two n-anterior (one of which is more  
193 n-dorsal), one n-posterior to the PB. They projected together into the n-dorsal plexus of CBU ('anterior-

194 ventral tract'; (11), slightly more n-dorsal than DM3. The projection bifurcated, one more n-anterior, one  
195 more n-posterior. The DM1 group consisted of three subgroups, all n-anterior to the protocerebral  
196 bridge. One more n-ventral and slightly more lateral, two were more n-dorsal, of which one was n-  
197 anterior to the other. The n-ventral group formed a separate more lateral projection (potentially the  
198 'anterior descending tract'; (11)) in comparison to the common projection of the other group ('anterior-  
199 ventral tract'; (11)).

200 In *Tribolium*, DM4 consisted of two groups localized n-anterior to the PB tip and one n-posterior to  
201 the PB tip. The bifurcation of the tract from both groups was similar to *Drosophila*, and they thus could  
202 also share a projection with a CM3 tract. A division into an n-anterior and n-posterior part was similar to  
203 *Drosophila*. A third group present in *Drosophila* was not marked or was not present in *Tribolium*. DM3  
204 consisted of two main groups, one more n-anterior to the PB, one n-posterior to the PB, an arrangement  
205 similar to *Drosophila*. They projected together with DM2 and 1 into the n-dorsal fraction of the CBU,  
206 while sharing the dlrCBU tunnel with DM3, with projections very similar to *Drosophila*. Cell bodies of  
207 DM2 were difficult to visualize but were slightly more medial to the DM3 belonging group. Hence  
208 approximate position was similar, but a subdivision in groups was hardly possible. Cell bodies of DM1  
209 were sparse, with some n-anterior and some n-posterior to the protocerebral bridge, like *Drosophila*  
210 without a subdivision into groups possible. The projection into the CBU was very similar. Note that, in  
211 general, cell groups of DM1-3 were n-dorsal, and not like in *Drosophila* n-anterior to the PB.

212

## 213 Supporting Material and Methods

### 214 Tc-Rx antibody generation and verification

215 An antibody for the *Drosophila* Rx (Dm-Rx) protein was kindly gifted by Dr. Uwe Walldorf (1). Its specificity  
216 was verified by absence of staining in Dm-Rx null mutant brains and by a similar expression pattern as *Dm-rx*  
217 RNA (1,2).

218 We tested cross-specificity of this antibody to the *Tribolium* Rx (Tc-Rx) protein. However, no staining was  
219 detected (data not shown). As the antigenic region of Dm-Rx used for antibody generation by (1) is absent or  
220 highly diverged in the *Tribolium* Rx protein (like in a number of other species, see Fig. S1) we used the Tc-Rx  
221 N-terminal region (amino acids 1-107), avoiding highly conserved homeobox and OAR domains to generate a  
222 suitable antibody. An N-terminal 321 bp gene sequence was amplified (primers including linker sequences: *Tc-*  
223 *rx-N\_fw* and *Tc-rx-N\_rev*, Table S2) from wildtype cDNA and cloned into a Golden Gate vector containing a 6x  
224 His-Tag and a sequence encoding for a SUMO polypeptide (KNE001, pET SUMO-GoldenGate) with a molar  
225 ratio of 1:5 of insert to vector (see below for source, modifications and cloning information).

226 For subsequent protein expression and purification, we essentially followed (22). The vector was  
227 transformed into bacteria of the BL21-DE3 Rosetta strain. Bacteria expressed the peptide in TB (Terrific Broth)  
228 medium with the addition of 15 mM Glucose by 0.8 mM IPTG induction at an OD<sub>600</sub> of 0.8 for four hours, were  
229 then harvested (5,000×g, 20 min, 4°C), resuspended in lysis buffer (50 mM Tris-HCl pH=7.5, 150 mM NaCl,  
230 10 mM Imidazole), fractionated using a microfluidizer 110S (Microfluidics, MA, USA) and cell debris was  
231 removed by centrifugation (30,000×g, 30 min, 4°C). The peptide was subsequently purified by immobilized  
232 metal ion affinity chromatography using an ÄKTAprime plus and Nickel-charged affinity columns (both GE  
233 Healthcare Lifesciences, Chicago, USA). Main steps included affinity chromatography with a linear gradient of  
234 elution buffer (50 mM Tris-HCl pH=7.5, 150 mM NaCl, 400 mM Imidazole), cleavage of the His<sub>6</sub>-SUMO tag with  
235 SUMO protease (1:50 molar ratio protease to peptide) with simultaneous dialysis (50 mM Tris-HCl pH=7.5,  
236 150 mM NaCl) over night at 4°C, a second affinity chromatography to remove the His<sub>6</sub>-SUMO tag and finally a  
237 size exclusion chromatography with the Superdex 30 16/60 (GE Healthcare) and storage in 1X PBS. The



238 purified protein fragment was used for polyclonal antibody generation and subsequent affinity purification of  
239 the antibody (Kaneka Eurogentec S.A., Belgium).

240 To exclude possible off-targets of the antibody and to validate whether the protein was correctly detected  
241 by the antibody (23), we performed a combination of *Tc-rx* in situ hybridisation (DIG-labelled full length  
242 probe, 0.4 µl in 30 µl hybridisation buffer) and Tc-Rx antibody staining in *Tribolium* embryos (Fig. S1)(24,25).  
243 We found a high degree of overlap between the antibody staining and in situ hybridisation (Fig. S1). No  
244 additional staining in the embryo was observed, so that off-targets seem unlikely. To confirm specificity for  
245 the endogenous protein, we performed parental RNAi against *Tc-rx* (1.5 µg/µl) following standard procedures  
246 (24). We then performed antibody stainings, including a control staining against Engrailed (to exclude  
247 differences in staining intensity) in knockdown and wildtype animals (Fig. S1). All steps from fixation to  
248 imaging were performed using a standardized protocol. Maximum intensity projections of 34 animals were  
249 grouped into three different Tc-Rx staining intensity groups. A blinded categorisation into wildtype and  
250 knockdown animals was performed and revealed that all knockdown animals belonged to middle or low  
251 strength categories confirming a reduction of Tc-Rx. Hence, the new antibody against Tc-Rx is highly specific  
252 for the provided antigen (affinity purification) and the endogenous protein (Fig. S1).

253

#### 254 **KNE001 cloning and map**

255 The vector KNE001 (Vector map S1, pET SUMO-GoldenGate) was based on pET SUMOadapt  
256 (modified from the pET SUMO expression vector; (26–28); material transfer agreement with Cornell  
257 University, U.S.A., ThermoFisher Scientific, MA, USA). This vector contained an adapter sequence with  
258 most importantly a *Bsal* type IIS recognition site, allowing residue-free cloning of the CDS of interest in-  
259 frame with the *ATG::6xHis::SUMO* open reading frame. A second *Bsal* site was then integrated by first  
260 amplifying a fragment additionally containing lac promoter, *CAT* gene and *ccdB* death cassette (29,30)  
261 with primers *GG\_ccdB\_F* and *GG\_ccdB\_R* (containing a *XhoI*-site) from pTALEN(NI)v2 (gift from Feng  
262 Zhang, Addgene Plasmid # 32189, (31)). Second, a *NotI/XhoI* digestion resulted in a 1.5 kb *NotI\_lacP-*

263 *CAT\_ccdB\_XhoI* fragment, which was ligated into the *NotI/XhoI* linearized pET SUMOadapt. Third, the  
264 new pET SUMO-GoldenGate was transformed in *ccdB Survival™ 2 T1R* Competent Cells (ThermoFisher  
265 Scientific, MA, USA).

266 Hence, by adding GoldenGate linker sequences (S2 Table) that contain *BsaI* cleavage sites (which do  
267 not equal the enzyme's recognition site) to the gene-specific forward and reverse primer, pET SUMO-  
268 GoldenGate and the CDS - in our case the N-terminal part of Tc-Rx - can be cut and ligated into a product  
269 lacking the original restriction sites. The *ccdB* cassette in the original KNE001 vector facilitates selection  
270 of clones with the gene fragment incorporated.

271

## 272 **Generation of a *Drosophila* bicistronic Rx transgenic line**

273 In order to generate a comprehensive picture of projections of all Dm-Rx-positive cells and to enable  
274 subsequent comparative development of Rx-positive cell groups, we generated a bicistronic line (Fig. S3)  
275 using the CRISPR/Cas9 technique (6,32). We also screened available transgenic lines, i.e. two VT-GAL4 lines  
276 (<https://stockcenter.vdrc.at>) that include small fragments of the Dm-Rx regulatory region and hence only  
277 covered very small portions of Dm-Rx expression (data not shown).

278 We built a bicistronic construct as part of the CRISPR repair template, consisting of the C-terminal part of  
279 the *Dm-rx* gene, the CDS encoding for *EGFP* and a *P2A* peptide sequence (21,33). The 22 amino acid long *P2A*  
280 peptide (21) is suggested to cause ribosomal skipping (34). This sequence, if placed between two genes or  
281 CDS enables the transcription of one long mRNA of *Dm-rx-P2A-EGFP*, but the translation of two separate  
282 proteins. The *P2A* and *EGFP* sequences were inserted by using a guide RNA with the target sequence near the  
283 *Dm-rx* STOP codon (guide A, Fig. S3). This should result in a common expression of Dm-Rx and EGFP in the  
284 same cells, without disturbing the function of either gene through e.g., a fusion product, but with EGFP being  
285 in the cytoplasm and Dm-Rx retaining its nuclear localisation.

286

287 We included the fluorescent eye marker *3XP3-DsRed* (35). Note that we avoided other eye or body  
288 markers, such as *mini-white* because of their size, which might reduce rates of homology-directed repair  
289 further. In order to reduce the possible influence of the 3XP3 promotor on Dm-Rx or EGFP expression we  
290 inserted the eye marker in the downstream intergenic region, by using a gRNA targeting the intergenic region  
291 (guide B, Fig. S3). To facilitate homology-directed repair we included two flanking homology arms (Fig. S3,  
292 Vector map S2). As a result, our repair template consisted of seven fragments, which we assembled using a  
293 Gibson Assembly® kit (New England Biolabs, MA, USA), following the manufacturer's instructions:

- 294 1. Backbone: pJET 1.2/blunt (K1231, ThermoFisher Scientific, MA, USA), EcoRV linearized
- 295 2. left homology arm (F1 (Fragment 1): 1 kb of the C-terminus of *Dm-rx* (CG10052) excluding STOP codon
- 296 3. P2A peptide (F2): insect codon-optimized sequence (Vector map S2) from plasmid KNE020  
297 (unpublished)
- 298 4. EGFP (F3): from plasmid gifted by the Wimmer department, University of Göttingen
- 299 5. 3' UTR and intergenic region from genomic DNA (F4): is the region between guide A and B3 (Fig. S3)
- 300 6. 3XP3-dsRED-SV40 (F5): eye marker, from plasmid gifted by the Wimmer department, University of  
301 Göttingen
- 302 7. Right homology arm (F6): 1 kb downstream of guide B3 cut site (three base pairs upstream of its PAM)

303 The target for guide A would thus be between F1 and F2, and the target for guide B between F5 and F6.

304 In order to identify single nucleotide polymorphisms in the target strain, integrate the right sequences for  
305 F1, F4, F6 and to identify suitable target sites and guide RNAs, we isolated genomic DNA (as described in (6))  
306 from the *Act5C-Cas9, DNAlig4[169]* donor stock (7), and PCR amplified and sequenced the *Dm-rx* C-terminal  
307 region, 3' UTR and intergenic region (primers *DmRx\_CDS\_3'UTR\_fw*, *DmRx\_CDS\_3'UTR\_rev*, *DmRx\_3'UTR\_int-*  
308 *region\_fw*, *DmRx\_3'UTR\_int-region\_rev*, Table S2). These regions were used to locate target sites (Fig. S3A<sup>iii</sup>)  
309 via the CRISPR Optimal Target Finder (<http://targetfinder.flycrispr.neuro.brown.edu/>). No off-targets were  
310 present for all targets selected. Annealed oligonucleotides were cloned into a U6:3-*BbsI* vector (based on  
311 pCFD3-dU6:3gRNA, Addgene #49410, (36), kindly provided by Hassan M.M. Ahmed (Wimmer department,  
312 University of Göttingen, unpublished)) via a GoldenGate reaction, following procedures in (6) but using *BbsI*

313 (New England Biolabs, MA, USA). Successful cloning was verified by sequencing the complete chimeric RNA  
314 scaffold (including trans-activating crRNA, (36)). guideRNAs were quality controlled by using a T7  
315 Endonuclease I assay (see (6) for procedure). Injection procedures followed descriptions in (37).

316 Based on the T7 Endonuclease I assay, we selected one guide for the guide A target site, and three with  
317 overlapping target sites for the target of guide B (B1-3) (Fig. S3A<sup>iii</sup>).

318 Next, we designed a 1 kb long F1 (left homology arm) so that it ended before the STOP of *Dm-rx*, as Guide  
319 A caused a Cas9 cut only 8 bp downstream of the *Dm-rx* STOP. F4 was designed from the 3'UTR start to the  
320 cut site of guide B3 (note that guide B1 and B2 were near B3), with modifications of all PAMs in primers P7  
321 and P8. F6 was 1 kb long, starting at the cut site of guide B3.

322 All fragments for the Gibson Assembly<sup>®</sup> were amplified using the primers P1 to P12 (Table S2), containing  
323 appropriate overlaps to the neighbouring fragment. F1, 4 and 6 were amplified from the previously isolated  
324 genomic DNA of *Act5C-Cas9*, *DNAIig4* line [169]. We then used three assembly reactions (roman numerals in  
325 primers P1 to P12). The first assembled F1 to F3, the second F4 to F6, and the third assembled the products of  
326 the first two reactions.

327 The four plasmids containing each guide and MF01 were precipitated (6,37) to ensure DNA purity and  
328 increase viability of embryos after injection. We then made three injection mixes, each containing one of the  
329 guides B1 to B3 (250 ng/μl), guide A (250 ng/μl) and MF01 (400 ng/μl), diluted in 1x injection buffer (37).  
330 Subsequent injections followed descriptions in (37).

331 We injected 1203 embryos of which 424 G<sub>0</sub> adults survived. We crossed them singly to three w<sup>1118</sup> virgins  
332 of the opposite sex of which 224 G<sub>1</sub> crossings gave rise to offspring. We then screened them under a  
333 fluorescence stereo microscope (Leica M205 FA, Leica, Wetzlar, Germany) for the presence of the 3XP3-DsRed  
334 eye marker and identified 27 positive independent lines. Note, however, that we observed heritable  
335 variability in strength and location of DsRed inside the *Drosophila* eye. We thus took four of the 27 positive  
336 stocks, with varying degree of eye marker strength and screened wandering third instar larval brains for any  
337 detectable differences in the presence of a GFP fluorescence signal resembling known Dm-Rx antibody  
338 staining (1). All four stocks did not vary in GFP expression and showed equal similarity to a Dm-Rx antibody

339 staining. To verify this tendency, we performed immunostainings in offspring embryos of these four lines and  
340 detected GFP and Dm-Rx signal through a GFP antibody staining. Embryos of all four stocks showed near  
341 100 % overlap to Dm-Rx and a cytoplasmic signal. Finally, to verify that insertion was performed as planned  
342 (Fig. S3A<sup>ii</sup>), we isolated genomic DNA from one whole adult male of each of the four stocks using the Zymo  
343 Research *Quick*-DNA Miniprep Plus kit (Zymo Research, Irvine, CA, USA) following the manufacturer's Solid  
344 Tissues Protocol. We then amplified DNA fragments containing the whole region by nested PCR (primers  
345 *DmRx\_trans-ver\_fw*, *DmRx\_trans-ver\_rev*, *DmRx\_trans-ver\_nested\_fw*, *DmRx\_trans-ver\_nested\_rev*, Table  
346 S2). We sequenced the regions surrounding the cut sites with primers *DmRx\_trans\_seq\_Ct\_fw* and  
347 *DmRx\_trans\_seq\_iRe\_rev* (Table S2). All four stocks showed correct sequencing at guide A cut sites, but only  
348 the line used in this study showed completely correct sequences, thus allowing us to perform suitable  
349 experiments and closer characterisation (Fig. S3C-F).

350 To verify that EGFP is indeed localised in the cytoplasm, we performed immunostainings for Dm-Rx and  
351 GFP in embryos. With higher magnification we were able to see a substantial amount of GFP in the cytoplasm  
352 surrounding the nuclei marked by Dm-Rx (Fig. S3C) and DAPI (not shown). We also wanted to know whether  
353 expression from the transgenic Dm-Rx locus was qualitatively different from the endogenous expression, so to  
354 ensure that we investigated Dm-Rx expression similar to a wildtype situation. For this we performed  
355 immunostainings against Dm-Rx in the adult *Drosophila* brain with identical settings and imaged them  
356 identically (Fig. S3D). We were not able to detect any absence of domains (Fig. S3D). Differences between the  
357 wildtype strain w<sup>1118</sup> and our transgenic line were – if present – as large as differences between individual  
358 brains of the same genetic background.

359 We then tested whether the expression of Dm-Rx and EGFP in the same cells is maintained in the adult  
360 brain (Fig. S3E-F). Indeed, by qualitative assessment we were able to see an approximately 100 %  
361 coexpression, with prominent projections marked as well (Fig. 3).

362 We thus concluded that the Rx-GFP bicistronic line was suited for our use.

363

364 **Characterisation and validation of the *Tribolium* Rx-GFP enhancer trap**

365 We identified a suitable *Tribolium* transgenic line in the GEKU base website (# E01101, <http://www.geku->  
366 [base.uni-goettingen.de/](http://www.geku-base.uni-goettingen.de/); (4)). Insertion had been mapped to the upstream region of *Tc-rx* ((4); Fig. S2A). To  
367 identify to which degree Tc-Rx expressing cells also express GFP we performed co-stainings in adult brains.  
368 We found that n-ventral Tc-Rx-positive cells were not marked by the line at all while n-dorsal domains were  
369 only partially marked (Fig. S4). However, by manually checking each GFP expressing cell, we found that all  
370 cells expressing GFP in the region surrounding the protocerebral bridge, also expressed Tc-Rx (Fig. S2B-D).  
371 Hence, there were no cells that were marked false-positively. Interestingly, there were more GFP expressing  
372 cells showing overlap to Tc-Rx expression in all other stages of development (Fig. S2E). To ensure that Tc-Rx is  
373 expressed similar to the wildtype situation, we performed identical immunostainings against Tc-Rx and  
374 imaging with identical settings in the transgenic line and wildtype  $v^w$  background (Fig. S2C)(38). We found that  
375 differences between conditions were no larger than the differences observed between individuals of the  
376 same condition. We thus concluded that the Rx-GFP enhancer trap was suitable for further experiments.

377

378 **Generation of homozygous stocks of Rx-GFP transgenic lines**

379 A homozygous stock of the *Tribolium* Rx-GFP enhancer trap was generated by genotyping adult wing  
380 tissue, as described in (6,39), with primers *GEKU-Rx-GFP\_wt\_fw*, *GEKU-Rx-GFP\_wt\_rev*, *GEKU-Rx-*  
381 *GFP\_trans\_rev* (Table S2).

382 A homozygous stock of the *Drosophila* Rx-GFP bicistronic line was generated by crossing the male  
383 offspring (G<sub>2</sub>) of the G<sub>1</sub> cross to female virgins of a  $w^-; wg^{Gla-1}/CyO$  2<sup>nd</sup> chromosome balancer (a kind gift by the  
384 Wimmer department, University of Göttingen).  $CyO/w^-$  positive animals (G3) were selected and crossed to  
385 each other, to create homozygous positive animals (G4) for the transformation marker (*3XP3-dsRed-SV40*).

386 Both transgenic lines were viable in the homozygous background.

387

388 **R45F08-GAL4 crosses**

389 To reveal the overlap of secondary cells of the DM1-3 and 6 lineages marked by the R45F08-GAL4 line  
390 (12,13) with Dm-Rx expressing cells we performed two crosses and subsequent immunostainings (Fig. S5).

391 First, we crossed the R45F08-GAL4 line with a UAS-mcD8::GFP line and investigated offspring third instar  
392 larvae to visualize the characterized cells and subsequently stained with anti-GFP and anti-Rx antibodies (Fig.  
393 S5A-B).

394 Second, to visualize an overlap of Dm-Rx expressing cells and R45F08 labelled cells, we first crossed the  
395 *Drosophila* Rx-GFP bicistronic line each separately with R45F08-GAL4 and UAS-mcD8::RFP. The respective  
396 offspring was then crossed to each other. We then dissected 15 brains of third instar larvae, stained them  
397 with anti-RFP and anti-GFP, screened for the presence of RFP and GFP label and imaged double-positive  
398 brains (Fig. S5C).

399

400 **Staging of *Tribolium* and *Drosophila* animals**

401 Table S6 displays all stages and their description included in our study. Particularly pupal staging and the  
402 late larval stages were determined using time (which allowed us to calculate relative times of pupation) and  
403 morphology as criteria to confirm the timed staging.

404 *Drosophila* embryonic stages were determined using the staging of (14) and pupal stages using staging in  
405 (15) (Table S6 displays the most important pupal selection criteria). Eye colouring and morphology were not  
406 included in staging due to the  $w^{1118}$  background. Information on the length of embryonic development used in  
407 Fig. 10 was derived from (14). Length of larval development and pupation was measured for our Rx-GFP  
408 bicistronic line specifically.

409 *Tribolium* embryonic stages were determined using the staging of (3) and for late embryonic stages using  
410 staging of Scholten and Klingler (unpublished). *Tribolium* pupal and late larval staging was aided by (40) and  
411 Dippel (unpublished). Information on length of embryonic development used in Fig. 10 was derived from (3)  
412 and Scholten and Klingler (unpublished). Total developmental time was taken from (41). Larval and pupal  
413 developmental length was measured for our Rx-GFP enhancer trap specifically. To that end, we first

414 determined the duration of pupation in the used Rx-specific transgenic lines. Pupation in the *Tribolium* Rx-GFP  
415 line took approximately 140 h, while pupation in the *Drosophila* Rx-GFP line took approximately 100 h. A  
416 developmental progress of 5 % equals 7 h in *Tribolium*, and 5 h in *Drosophila*.

417

### 418 **Specimen fixation and immunohistochemistry**

419 Methanol fixation of *Drosophila* embryos was performed following standard protocols (42). Fixation of  
420 *Tribolium* embryos was based on (43) with following modifications: Fixation was performed with 2 ml of  
421 fixation buffer PEMS (0.1 M PIPES, 2 mM MgCl, 5 mM EGTA, pH = 6.9); we added 180 µl of 37 % formaldehyde  
422 (F 1635, Merck, Darmstadt, Germany) and fixed embryos between 25 and 32 min; devitellinisation was first  
423 conducted with a 0.9 µm canula, for older stages (> 40 h) we followed with a 0.8 µm canula.

424 Immunohistochemistry of embryos was based on procedures in (25), with the addition of preceding  
425 washes in a descending methanol series (75, 50 and 25 % Methanol with PBS-T 0.1 %), followed by two rinse  
426 steps and three 10 min washes.

427 For all stainings normal goat serum was used as blocking solution (NGS, G9023, Merck, Darmstadt  
428 Germany, see Table S3). Fixative for all other stages except for embryos was 4 % PFA (wt/vol,  
429 paraformaldehyde, (e.g. P6148, Merck, Darmstadt, Germany) in PBS, 130 mM NaCl, 7 mM Na<sub>2</sub>HPO<sub>4</sub>, 3 mM  
430 KH<sub>2</sub>PO<sub>4</sub>, (44)). Washing buffer for all stages except embryos was phosphate buffer (PB, see (20) for recipe).  
431 Brains were dissected using Dumont No. 5 forceps in ice-cold PB. All steps were performed in 180 µl volume in  
432 9-well PYREX™ Spot Plates (ThermoFisher Scientific, MA, USA) on an orbital shaker. Protocols were adapted  
433 from (20,44).

434

### 435 **Image acquisition, processing and 3D reconstruction**

436 If not otherwise specified, imaging was performed at a Leica SP8 confocal microscope (Wetzlar,  
437 Germany). Objectives used were either a Leica apochromat 20x (NA = 0.75) or a 63x HC PL APO CS2  
438 (NA = 1.30) glycerol-immersion objective. DAPI was excited by a Diode laser (405 nm), Alexafluor 488  
439 (ThermoFisher Scientific, MA, USA) by an Argon laser (488 nm), Alexafluor 555 by a DPSS laser (561 nm) and



440 Alexafluor 647 by a HeNe laser (633 nm). Detection was performed with Hybrid detectors and  
441 photomultipliers, at an 8-bit depth. Averaging was depending on which staining was performed, set on line or  
442 frame averaging of 4. Step size was set to system optimized values defined by the LASX software. Image size  
443 was set between 1,024 x 1,024 and 2,048 x 2,048 pixels. Images were processed, adjusted for brightness and  
444 contrast, cropped, merged and rotated using the Fiji software (45). Maximum intensity projections and  
445 smooth manifold extractions (SMEs; (8)) to retain 3D spatial relationships were calculated using Fiji as well  
446 (45).

447 3D reconstructions were performed in Amira 5.4.1 (Visage Imaging, Fürth, Germany). We created  
448 Labelfield data with the same pixel and voxel size resolution as the original data set. We then used the  
449 Segmentation Editor to identify and create material for each tract and central complex neuropils by  
450 employing the Wand tool. Subsequent marking was modified for visual ease using the grow, fill holes and  
451 smooth functions of the Segmentation Editor. Subsequently we created 3D surfaces with the Surface  
452 Generator.

453 In some cases, projections were too thin to be recapitulated in the 3D surface. For this, where we logically  
454 inferred a connection of axons that was only faintly marked by the original file, we used the Brush tool.

455 We only reconstructed the axon connections to certain cell bodies where we were sure that they are  
456 directly connected. This excluded a few cell bodies from the analysis, particularly in the *Drosophila* adult  
457 brain.

## 458 References

- 459 1. Davis RJ, Tavsanli BC, Dittrich C, Walldorf U, Mardon G. *Drosophila retinal homeobox (drx)* is not required for  
460 establishment of the visual system, but is required for brain and clypeus development. *Dev Biol.* 2003 Jul;259(2):272–87.
- 461 2. Eggert T, Hauck B, Hildebrandt N, Gehring WJ, Walldorf U. Isolation of a *Drosophila* homolog of the vertebrate homeobox  
462 gene Rx and its possible role in brain and eye development. *Proc Natl Acad Sci.* 1998 Mar 3;95(5):2343–8.
- 463 3. Biffar L, Stollewerk A. Conservation and evolutionary modifications of neuroblast expression patterns in insects. *Dev Biol.*  
464 2014 Apr;388(1):103–16.
- 465 4. Trauner J, Schinko J, Lorenzen MD, Shippy TD, Wimmer EA, Beeman RW, et al. Large-scale insertional mutagenesis of a  
466 coleopteran stored grain pest, the red flour beetle *Tribolium castaneum*, identifies embryonic lethal mutations and  
467 enhancer traps. *BMC Biol.* 2009 Nov 5;7(1):73.
- 468 5. Lorenzen MD, Brown SJ, Denell RE, Beeman RW. Cloning and characterization of the *Tribolium castaneum* eye-color  
469 genes encoding tryptophan oxygenase and kynurenine 3-monooxygenase. *Genetics.* 2002 Jan;160(1):225–34.
- 470 6. Farnworth MS, Eckermann KN, Ahmed HMM, Mühlen DS, He B, Bucher G. The Red Flour Beetle as Model for Comparative  
471 Neural Development: Genome Editing to Mark Neural Cells in Tribolium Brain Development. In: Sprecher SG, editor. *Brain*  
472 *Development.* New York, NY: Springer New York; 2020. p. 191–217. Available from:  
473 [http://link.springer.com/10.1007/978-1-4939-9732-9\\_11](http://link.springer.com/10.1007/978-1-4939-9732-9_11)
- 474 7. Zhang X, Koolhaas WH, Schnorrer F. A Versatile Two-Step CRISPR- and RMCE-Based Strategy for Efficient Genome  
475 Engineering in *Drosophila*. *G3 Genes Genomes Genet.* 2014 Dec 1;4(12):2409–18.
- 476 8. Shihavuddin A, Basu S, Rexhepaj E, Delestro F, Menezes N, Sigoillot SM, et al. Smooth 2D manifold extraction from 3D  
477 image stack. *Nat Commun.* 2017 May 31;8:15554.
- 478 9. Ito K, Shinomiya K, Ito M, Armstrong JD, Boyan G, Hartenstein V, et al. A Systematic Nomenclature for the Insect Brain.  
479 *Neuron.* 2014 Feb;81(4):755–65.
- 480 10. Lovick JK, Ngo KT, Omoto JJ, Wong DC, Nguyen JD, Hartenstein V. Postembryonic lineages of the *Drosophila* brain: I.  
481 Development of the lineage-associated fiber tracts. *Dev Biol.* 2013 Dec 15;384(2):228–57.
- 482 11. Wong DC, Lovick JK, Ngo KT, Borisuthirattana W, Omoto JJ, Hartenstein V. Postembryonic lineages of the *Drosophila*  
483 brain: II. Identification of lineage projection patterns based on MARCM clones. *Dev Biol.* 2013 Dec 15;384(2):258–89.
- 484 12. Jenett A, Rubin GM, Ngo T-TB, Shepherd D, Murphy C, Dionne H, et al. A GAL4-Driver Line Resource for *Drosophila*  
485 Neurobiology. *Cell Rep.* 2012 Oct 25;2(4):991–1001.
- 486 13. Riebli N, Viktorin G, Reichert H. Early-born neurons in type II neuroblast lineages establish a larval primordium and  
487 integrate into adult circuitry during central complex development in *Drosophila*. *Neural Develop.* 2013 Apr 23;8:6.
- 488 14. Campos-Ortega JA, Hartenstein V. *The Embryonic Development of Drosophila melanogaster.* New York: Springer-Verlag;  
489 1985.
- 490 15. Bainbridge SP, Bownes M. Staging the metamorphosis of *Drosophila melanogaster*. *J Embryol Exp Morphol.* 1981  
491 Dec;66:57–80.
- 492 16. Williams JL, Güntner M, Boyan G. Building the central complex of the grasshopper *Schistocerca gregaria*: temporal  
493 topology organizes the neuroarchitecture of the w, x, y, z tracts. *Arthropod Struct Dev.* 2005;34:97–110.
- 494 17. Boyan GS, Williams JLD, Herbert Z. Fascicle switching generates a chiasmal neuroarchitecture in the embryonic central  
495 body of the grasshopper *Schistocerca gregaria*. *Arthropod Struct Dev.* 2008 Nov 1;37(6):539–44.

- 496 18. Boyan G, Williams L. Embryonic development of the insect central complex: Insights from lineages in the grasshopper and  
497 *Drosophila*. *Arthropod Struct Dev*. 2011 Jul 1;40(4):334–48.
- 498 19. Bentley D, Keshishian H, Shankland M, Toroian-Raymond A. Quantitative staging of embryonic development of the  
499 grasshopper, *Schistocerca nitens*. *Development*. 1979 Dec 1;54(1):47–74.
- 500 20. Ostrovsky A, Cachero S, Jefferis G. Clonal Analysis of Olfaction in *Drosophila*: Immunocytochemistry and Imaging of Fly Brains.  
501 *Cold Spring Harb Protoc*. 2013 Jan 4;2013(4):pdb.prot071720.
- 502 21. Kim JH, Lee S-R, Li L-H, Park H-J, Park J-H, Lee KY, et al. High Cleavage Efficiency of a 2A Peptide Derived from Porcine  
503 Teschovirus-1 in Human Cell Lines, Zebrafish and Mice. *PLOS ONE*. 2011 Apr 29;6(4):e18556.
- 504 22. Monecke T, Buschmann J, Neumann P, Wahle E, Ficner R. Crystal Structures of the Novel Cytosolic 5'-Nucleotidase IIIB  
505 Explain Its Preference for m7GMP. *PLOS ONE*. 2014 Mar 6;9(3):e90915.
- 506 23. Uhlen M, Bandrowski A, Carr S, Edwards A, Ellenberg J, Lundberg E, et al. A proposal for validation of antibodies. *Nat*  
507 *Methods*. 2016 Oct;13(10):823–7.
- 508 24. Posnien N, Schinko J, Grossmann D, Shippy TD, Konopova B, Bucher G. RNAi in the Red Flour Beetle (*Tribolium*). *Cold*  
509 *Spring Harb Protoc*. 2009 Jan 8;2009(8):pdb.prot5256.
- 510 25. Buescher M, Oberhofer G, Garcia-Perez NC, Bucher G. A Protocol for Double Fluorescent In Situ Hybridization and  
511 Immunohistochemistry for the Study of Embryonic Brain Development in *Tribolium castaneum*. In: Sprecher SG, editor.  
512 *Brain Development*. New York, NY: Springer New York; 2020. p. 219–32. Available from:  
513 [http://link.springer.com/10.1007/978-1-4939-9732-9\\_12](http://link.springer.com/10.1007/978-1-4939-9732-9_12)
- 514 26. Bosse-Doenecke E, Weininger U, Gopalswamy M, Balbach J, Knudsen SM, Rudolph R. High yield production of  
515 recombinant native and modified peptides exemplified by ligands for G-protein coupled receptors. *Protein Expr Purif*.  
516 2008 Mar 1;58(1):114–21.
- 517 27. Hanington PC, Barreda DR, Belosevic M. A Novel Hematopoietic Granulin Induces Proliferation of Goldfish (*Carassius*  
518 *auratus* L.) Macrophages. *J Biol Chem*. 2006 Apr 14;281(15):9963–70.
- 519 28. Mossesso E, Lima CD. Ulp1-SUMO Crystal Structure and Genetic Analysis Reveal Conserved Interactions and a  
520 Regulatory Element Essential for Cell Growth in Yeast. *Mol Cell*. 2000 May 1;5(5):865–76.
- 521 29. Bernard P, Gabarit P, Bahassi EM, Couturier M. Positive-selection vectors using the F plasmid ccdB killer gene. *Gene*. 1994  
522 Oct 11;148(1):71–4.
- 523 30. Engler C, Kandzia R, Marillonnet S. A One Pot, One Step, Precision Cloning Method with High Throughput Capability. *PLOS*  
524 *ONE*. 2008 Nov 5;3(11):e3647.
- 525 31. Sanjana NE, Cong L, Zhou Y, Cunniff MM, Feng G, Zhang F. A transcription activator-like effector toolbox for genome  
526 engineering. *Nat Protoc*. 2012 Jan;7(1):171–92.
- 527 32. Gratz SJ, Wildonger J, Harrison MM, O'Connor-Giles KM. CRISPR/Cas9-mediated genome engineering and the promise of  
528 designer flies on demand. *Fly (Austin)*. 2013 Oct 30;7(4):249–55.
- 529 33. Szymczak-Workman AL, Vignali KM, Vignali DAA. Design and Construction of 2A Peptide-Linked Multicistronic Vectors.  
530 *Cold Spring Harb Protoc*. 2012 Feb 1;2012(2):pdb.ip067876-pdb.ip067876.
- 531 34. Donnelly MLL, Luke G, Mehrotra A, Li X, Hughes LE, Gani D, et al. Analysis of the aphthovirus 2A/2B polyprotein 'cleavage'  
532 mechanism indicates not a proteolytic reaction, but a novel translational effect: a putative ribosomal 'skip.' *J Gen Virol*.  
533 2001;82(5):1013–25.
- 534 35. Berghammer AJ, Klingler M, Wimmer EA. A universal marker for transgenic insects. *Nature*. 1999 Nov;402(6760):370.

- 535 36. Port F, Chen H-M, Lee T, Bullock SL. Optimized CRISPR/Cas tools for efficient germline and somatic genome engineering in  
536 *Drosophila*. Proc Natl Acad Sci. 2014 Jul 22;111(29):E2967–76.
- 537 37. Eckermann KN, Ahmed HMM, KaramiNejadRanjbar M, Dippel S, Ogaugwu CE, Kitzmann P, et al. Hyperactive piggyBac  
538 transposase improves transformation efficiency in diverse insect species. Insect Biochem Mol Biol. 2018 Jul;98:16–24.
- 539 38. Lorenzen MD, Brown SJ, Denell RE, Beeman RW. Cloning and characterization of the *Tribolium castaneum* eye-color  
540 genes encoding tryptophan oxygenase and kynurenine 3-monooxygenase. Genetics. 2002 Jan;160(1):225–34.
- 541 39. Strobl F, Ross JA, Stelzer EHK. Non-lethal genotyping of *Tribolium castaneum* adults using genomic DNA extracted from  
542 wing tissue. Papadopoulos NT, editor. PLOS ONE. 2017 Aug 11;12(8):e0182564.
- 543 40. Ho FK. Optic Organs of *Tribolium confusum* and *T. castaneum* and Their Usefulness in Age Determination (Coleoptera:  
544 Tenebrionidae). Ann Entomol Soc Am. 1961 Nov 1;54(6):921–5.
- 545 41. Sokoloff A. The Biology of *Tribolium*. Oxford: Clarendon Press; 1974.
- 546 42. Rothwell WF, Sullivan W. Fixation of *Drosophila* Embryos. Cold Spring Harb Protoc. 2007 Jan 9;2007(9):pdb.prot4827.
- 547 43. Schinko J, Posnien N, Kittelmann S, Koniszewski N, Bucher G. Single and Double Whole-Mount In Situ Hybridization in Red  
548 Flour Beetle (*Tribolium*) Embryos. Cold Spring Harb Protoc. 2009 Jan 8;2009(8):pdb.prot5258.
- 549 44. Riemensperger T, Isabel G, Coulom H, Neuser K, Seugnet L, Kume K, et al. Behavioral consequences of dopamine  
550 deficiency in the *Drosophila* central nervous system. Proc Natl Acad Sci. 2011 Jan 11;108(2):834–9.
- 551 45. Schindelin J, Arganda-Carreras I, Frise E, Kaynig V, Longair M, Pietzsch T, et al. Fiji: an open-source platform for biological-  
552 image analysis. Nat Methods. 2012 Jul;9(7):676–82.
- 553
